# 1 Two distinct functional axes of positive feedback-enforced PRC2 2 recruitment in mouse embryonic stem cells

3 Matteo Perino\*<sup>1,3</sup>, Guido van Mierlo\*<sup>2,4</sup>, Sandra M.T. Wardle<sup>1</sup>, Hendrik Marks<sup>2,&,#</sup> & Gert Jan C.  
4 Veenstra<sup>1,&,#</sup>

5 <sup>1</sup> Department of Molecular Developmental Biology, Faculty of Science, Radboud Institute for  
6 Molecular Life Sciences, Radboud University, Nijmegen, the Netherlands

7 <sup>2</sup> Department of Molecular Biology, Faculty of Science, Radboud Institute for Molecular Life  
8 Sciences, Nijmegen, Radboud University, the Netherlands

9 <sup>3</sup> Current address: Genome Biology Unit, European Molecular Biology Laboratory (EMBL),  
10 Heidelberg, Germany

11 <sup>4</sup> Current address: Oncode Institute, Department of Molecular Biology, Radboud University, the  
12 Netherlands

13

14 \* Contributed equally

15 & Contributed equally

16 # Correspondence: [h.marks@science.ru.nl](mailto:h.marks@science.ru.nl); [g.veenstra@science.ru.nl](mailto:g.veenstra@science.ru.nl)

17

## 18 Highlights

- 19 • Systematic analysis of Polycomb complex binding to target loci in mESCs using null  
20 mutations and chemical inhibition.
- 21 • PRC1, PRC2.1 and PRC2.2 are all mutually dependent for binding to chromatin, mediated in  
22 part by H3K27me3.
- 23 • PRC2.1 recruitment is dependent on MTF2
- 24 • PRC2.2 recruitment by JARID2 is dependent on PRC1 and largely redundant with  
25 recruitment by H3K27me3

26

## 27 Abstract

28 Polycomb Repressive Complex 2 (PRC2) plays an essential role in development by catalysing  
29 trimethylation of histone H3 lysine 27 (H3K27me3), resulting in gene repression. PRC2 consists of  
30 two sub-complexes, PRC2.1 and PRC2.2, in which the PRC2 core associates with distinct ancillary  
31 subunits such as MTF2 and JARID2, respectively. Both MTF2, present in PRC2.1, and JARID2,  
32 present in PRC2.2, play a role in core PRC2 recruitment to target genes in mouse embryonic stem  
33 cells (mESCs). However, it remains unclear how these distinct sub-complexes cooperate to establish  
34 Polycomb domains. Here, we combine a range of Polycomb mutant mESCs with chemical inhibition  
35 of PRC2 catalytic activity, to systematically dissect their relative contributions to PRC2 binding to  
36 target loci. We find that PRC2.1 and PRC2.2 mediate two distinct paths for recruitment, with  
37 mutually reinforced binding. Part of the cross-talk between PRC2.1 and PRC2.2 occurs via their  
38 catalytic product H3K27me3, which is bound by the PRC2 core-subunit EED, thereby mediating a  
39 positive feedback. Strikingly, removal of either JARID2 or H3K27me3 only has a minor effect on  
40 PRC2 recruitment, whereas their combined ablation largely attenuates PRC2 recruitment. This  
41 strongly suggests an unexpected redundancy between JARID2 and EED-H3K27me3-mediated  
42 recruitment of PRC2. Furthermore, we demonstrate that all core PRC2 recruitment occurs through the  
43 combined action of MTF2-mediated recruitment of PRC2.1 to DNA and PRC1-mediated recruitment  
44 of JARID2-containing PRC2.2. Both axes of binding are supported by EED-H3K27me3 positive  
45 feedback, but to a different degree. Finally, we provide evidence that PRC1 and PRC2 mutually

46 reinforce reciprocal binding. Together, these data disentangle the interdependent and cooperative  
47 interactions between Polycomb complexes that are important to establish Polycomb repression at  
48 target sites.

## 49 Introduction

50 Cell fate specification during embryonic development requires tightly controlled epigenetic programs.  
51 A key component safeguarding these processes is Polycomb Repressive Complex 2 (PRC2), an  
52 enzymatic protein complex that catalyses mono-, di- and trimethylation of histone 3 lysine 27  
53 (H3K27me1/2/3), which plays an essential role in the establishment of cellular identity by ensuring  
54 proper gene silencing (Pengelly et al., 2013). The critical role of PRC2 during developmental  
55 processes is underscored by the embryonic lethality observed in mice lacking a functional PRC2  
56 complex (Faust et al., 1998; O'Carroll et al., 2001; Pasini et al., 2007). PRC2 consists of the core  
57 subunits EED, SUZ12 and EZH2, the latter being the catalytic subunit. In addition, PRC2 contains  
58 multiple ancillary subunits exerting functions such as guiding PRC2 to target genes and modulating  
59 its enzymatic activity. These include PCL proteins (PHF1, MTF2 or PHF19), EPOP (also known as  
60 C17ORF96) and PALI1/2 (also known as C10ORF12), which together with the core subunits  
61 comprise PRC2.1. The core subunits can alternatively associate with JARID2 and AEBP2 in another  
62 PRC2 subcomplex, referred to as PRC2.2 (Conway et al., 2018; van Mierlo et al., 2019a).

63 Within mouse embryonic stem cells (mESCs), the PRC2 core complex is mainly associated with  
64 MTF2 and EPOP (PRC2.1), or with AEBP2 and JARID2 (PRC2.2) (Kloet et al., 2016). Alternative  
65 PRC2.1 complexes containing either PHF1 or PHF19, and/or PALI1/2 are less abundant. In recent  
66 years, our understanding of Polycomb regulation in terms of recruitment and enzymatic activity has  
67 significantly increased. First, it has been shown that PRC2 can be recruited by the facultative subunits  
68 MTF2 and JARID2 in mESCs, while ablation of either EPOP or AEBP2 does not affect PRC2  
69 localization (Beringer et al., 2016; Casanova et al., 2011; Grijzenhout et al., 2016; Landeira et al.,  
70 2010; Li et al., 2017; Liefke et al., 2016; Son et al., 2013). Second, after the first establishment of  
71 PRC2 binding, the complex can self-reinforce and spread from its target sites through an allosteric  
72 positive feedback loop by binding of the EED WD40 domain to H3K27me3 (Margueron et al., 2009;  
73 Poepsel et al., 2018). As this mechanism is not sufficient for H3K27me3 maintenance during cell  
74 division (Laprell et al., 2017), this indicates the importance of continuous *de novo* recruitment of core  
75 PRC2 by its auxiliary subunits. Third, PRC2 can be recruited through non-canonical PRC1, which  
76 binds to non-methylated DNA via its subunit KDM2B, and catalyses ubiquitination of H2A  
77 (H2AK119ub). This mark, in turn, can be bound by JARID2, resulting in PRC2 recruitment (Cooper  
78 et al., 2016; Kalb et al., 2014; Tavares et al., 2012). Finally, the H3K27me3 mark can be bound by  
79 canonical PRC1 via CBX subunits, which may contribute to gene repression by chromatin  
80 compaction (Isono et al., 2013; Lau et al., 2017; Morey et al., 2012). The bulk of H2A ubiquitination,  
81 however, is mediated by variant PRC1 complexes that contain one of several PCGF proteins (Fursova  
82 et al., 2019).

83 It has become clear that MTF2 and JARID2 together are required for PRC2 recruitment to target  
84 genes in mESCs, as combined ablation of MTF2 and JARID2 in mESCs lack PRC2 recruitment to  
85 target genes (Oksuz et al., 2018). This seems to depend to a large extent on MTF2-mediated DNA  
86 binding with a relatively minor contribution of JARID2 (Casanova et al., 2011; Li et al., 2017; Perino  
87 et al., 2018). Yet, while MTF2 and JARID2 are mutually exclusive within PRC2 complexes, the  
88 absence of either of the two partially reduces the binding of the other (Perino et al., 2018). This  
89 suggests that PRC2.1 and PRC2.2 could directly or indirectly synergize in establishing Polycomb at  
90 target genes. Whether such a cooperativity exists, how it would materialize, what the relative  
91 contribution is of PRC2.1 and PRC2.2, and how PRC1 plays a role in this process remains to be  
92 defined. Here, we combine a range of Polycomb mutant ESCs with chemical inhibition of PRC1 and  
93 PRC2 to address the complex interactions of the Polycomb system using ChIP-sequencing. We assess  
94 the individual contributions of primary recruitment mechanisms established by JARID2, MTF2 and  
95 H3K27me3. Our data strongly indicates that PRC2.1 and PRC2.2 act synergistically for PRC2  
96 recruitment, an interaction that is partially mediated through H3K27me3. Furthermore, our data  
97 indicate that H3K27me3-mediated recruitment of PRC2 can be compensated for by JARID2-mediated

98 recruitment and vice versa. Moreover, we provide evidence that this apparent redundancy is mediated  
99 through JARID2 and PRC1-deposited H2AK119ub. Together, our data support a model in which core  
100 PRC2 recruitment requires the concerted action of MTF2 and JARID2, as well as EED binding to  
101 H3K27me3. These modes of recruitment can be subdivided into two major axes, of which one relies  
102 more on MTF2-mediated DNA binding, and the other to a larger extent on JARID2-H3K27me3-  
103 PRC1 mediated recruitment. Moreover, these different recruitment axes appear to carry different  
104 weights across the genome. The data presented here demonstrate that the interactions between PRC2  
105 sub-complexes are tuned depending on the genomic region and highlight their relevance in  
106 establishing PRC2 binding at target sites.

107

## 108 **Methods**

### 109 **Embryonic stem cell culture**

110 Wildtype E14 ESCs (129/Ola background) and knockout ESCs were maintained in Dulbecco's  
111 Modified Eagle Medium (DMEM) containing 15% fetal bovine serum, 10 mM Sodium Pyruvate  
112 (Gibco), 5  $\mu$ M beta mercaptoethanol (BME; Sigma) and Leukemia inhibitory factor (LIF: 1000U/ml;  
113 Millipore). *Eed*<sup>-/-</sup> ESCs have been described by Schoeftner et al.(Schoeftner et al., 2006), *Jarid2*<sup>-/-</sup>  
114 ESCs have been described in Landeira et al. (Landeira et al., 2010), *Mtf2* knockout (*Mtf2*<sup>GT/GT</sup>) (Li et  
115 al., 2011) and *Ring1a*<sup>-/-</sup>/*Ring1b*<sup>+/-</sup> ESCs (Endoh et al., 2008) were a kind gift from Haruhiko Koseki.  
116 *Ring1b* ESCs are knockout for *Ring1a* and trans-heterozygous for *Ring1b* (null/floxed). Full knockout  
117 of *Ring1b* was induced through treatment with Tamoxifen (OHT) for 2 days. To inhibit EED function,  
118 ESCs were treated with 10  $\mu$ M EED226 (Qi et al., 2017) for 4 days. Complete removal of H3K27me3  
119 was validated using western blot. To deplete H2AK119ub, mESCs were treated with 10  $\mu$ M MG132  
120 for 6 hours (Tavares et al., 2012). Complete removal of H2AK119ub was validated using western  
121 blot.

### 122 **Western blot and antibodies**

123 Cell pellets were dissolved in RIPA buffer at a density of 10<sup>4</sup> cells per  $\mu$ l and briefly sonicated to  
124 ensure proper cell lysis. Proteins denatured in SDS-PAGE gels were transferred onto PVDF  
125 membranes. Primary antibodies used were rabbit anti-MTF2 (ProteinTech; 16208-1-AP), rabbit anti-  
126 JARID2 (Novus Bio; NB100-2214), rabbit anti-H3K27me3 (Millipore; 07-449), rabbit anti-H3  
127 (Abcam;1791). Secondary antibodies were HRP-conjugated anti-rabbit (Dako; P0217) and anti-mouse  
128 (Dako; P0161). Protein bands were visualized using Pierce ECL western blotting substrate (Thermo).  
129 Images were analysed using ImageJ.

### 130 **ChIP-sequencing**

131 Cells were crosslinked in 1% PFA at room temperature for 10 min. The crosslinking reaction was  
132 halted using 1.25M glycine and cells were harvested by scraping in buffer B (0.25% Triton X-100, 10  
133 mM EDTA, 0.5 mM EGTA, 20 mM HEPES). The suspension was centrifuged for 5 min at 1600 rpm,  
134 4 °C and the pellet was resuspended in 30 ml buffer C (150 mM, 1 mM EDTA, 0.5 mM EGTA, 50  
135 mM HEPES) and rotated for 10 min at 4 °C. The nuclei were centrifuged 5 min at 1600 rpm, 4 °C and  
136 resuspended in incubation buffer (0.15% SDS, 1% Triton X-100, 150 mM NaCl, 1 mM EDTA, 0.5  
137 mM EGTA, 20 mM HEPES) supplemented with Protease inhibitor. Nuclei were sonicated using a  
138 Biorupter Pico to obtain chromatin with an enriched DNA length of 300 bp. The chromatin was snap  
139 frozen and stored at -80 °C until further use. For ChIP, sonicated chromatin was incubated overnight  
140 with the required antibody and pulled down using protein A/G magnetic beads (Perino et al., 2018).  
141 After washes, eluted chromatin was de-crosslinked overnight and purified with MinElute PCR  
142 Purification columns (Qiagen). After qPCR quality check for target enrichment, up to 5 ng/sample of  
143 ChIP was prepared for sequencing using the Kapa Hyper-prep Kit (Kapa Biosystems) using

144 NEXTFlex adapters (Bio Scientific), followed by 8-11 cycles amplification by PCR. After size-  
145 selection using E-gel (Invitrogen) to enrich for 300bp fragments, libraries were sequenced paired-end  
146 on an Illumina NextSeq500. qPCR analysis of ChIP DNA was performed with iQ SYBR Green  
147 Supermix (Bio-Rad) on a CFX96 Real-Time System C1000 Thermal Cycler (Bio-Rad). All the ChIP-  
148 Seq experiments in this study were performed at least in duplicate, from independent chromatin  
149 preparations.

#### 150 **ChIP antibodies**

151 ChIP was performed using 3 µl/sample of the following antibodies: MTF2 (Aviva System Biology  
152 ARP34292, lot QC49692-42166), H3K27me3 (Millipore 07-449, lot 2717675), EZH2 (Diagenode  
153 C15410039, lot 003), JARID2 (Novus Biologicals NB100-2214, Lot E2), RING1B (Abcam, AB3832  
154 lot GR86503-25).

#### 155 **Bioinformatic analysis**

156 Data from Perino *et al.*, (Perino et al., 2018) were reprocessed in parallel with those of this study. To  
157 ensure maximum comparability (75bp single-end vs 42bp paired-end) and accurate quantification, all  
158 fastq files were trimmed to 42bp using fastx\_trimmer (version 0.0.13.2), and in case of paired-end  
159 sequencing only read\_1 was used analysis. All fastq files were mapped using bwa (version 0.7.10-  
160 r789), filtered to retain only uniquely mapping reads using mapping quality of 30 and samtools  
161 (version 1.7, flag -F 1024), then normalized for sequencing depth to produce bigwig. Peaks were  
162 called with MACS2-2.7 (Zhang et al., 2008) with qvalue 0.0001 using --call-summits for transcription  
163 factors and --broad for H3K27me3. Only peaks independently called in both replicates were used for  
164 downstream analysis. High-confidence peaks for each mark were obtained by merging peaks called in  
165 both replicates and overlapping by at least 50% of their length, and combined to obtain the list of all  
166 PRC2 peaks. Heatmaps of ChIP-Seq signal were generated using fluff v3.0.2 (Georgiou and van  
167 Heeringen, 2016), and clustered for dynamics using the “-g” option. ChIP metaplots were obtained  
168 with deeptools v 3.1.3 (Ramírez et al., 2016). Anatomy term enrichment was calculated using  
169 MouseMine (Motenko et al., 2015). RPKM bootstrapping analysis was performed using scipy (v  
170 1.1.0). RPKM from the two independent ChIPseq replicates were combined into a single pool. Values  
171 were drawn from this pool, recorded, and returned, such that every value could be drawn multiple  
172 times. For each bootstrapping round a number of values matching the total number of PRC2 peaks  
173 was drawn, and the median plotted as one dot in the swarmplot. Confidence intervals (99.9%) were  
174 calculated from 100 bootstrapping events.

#### 175 **Whole cell proteomes**

176 Cell pellets were dissolved in RIPA buffer at a density of 10<sup>4</sup> cells per µl and briefly sonicated to  
177 ensure proper cell lysis (van Mierlo et al., 2019b). Protein extracts (10 µg) were processed using Filter  
178 Aided Sample Preparation (FASP) and digested overnight with Trypsin. Peptide mixtures were  
179 desalted prior to LC-MS analysis. Thermo RAW files were analysed using MaxQuant 1.5.1.0 with  
180 default settings and LFQ, IBAQ and match between runs enabled. In Perseus, contaminant and  
181 reverse hits were filtered out. WT, MTF2 knockout and JARID2 knockout ESCs were grouped. Only  
182 proteins that had an LFQ value in at least one of the conditions were maintained. Missing values were  
183 imputed using default settings in Perseus.

184

185

186



## 187 Results

### 188 PRC2 recruitment mainly depends on MTF2

189 Recent advances have pinpointed three main recruitment mechanisms of PRC2: 1) DNA-mediated  
190 recruitment via MTF2; 2) recruitment via JARID2; and 3) H3K27me<sub>3</sub>-mediated recruitment via EED  
191 (Fig. 1a) (Cooper et al., 2016; Li et al., 2017; Margueron et al., 2009; Oksuz et al., 2018; Pasini et al.,  
192 2010; Perino et al., 2018). Currently, it remains unclear how these mechanisms relate to each other or  
193 cooperate in establishing PRC2 binding at target genes. To investigate this, we first evaluated whether  
194 these mechanisms act at the same genomic sites by performing chromatin immunoprecipitation  
195 followed by massive parallel sequencing (ChIP-seq) using antibodies against endogenous EZH2,  
196 H3K27me<sub>3</sub>, MTF2 and JARID2. We performed peak calling for EZH2 and determined the occupancy  
197 of H3K27me<sub>3</sub>, MTF2 and JARID2 on these peak sites, which revealed a near-perfect overlap (Fig.  
198 1b). The same scenario was evident for peaks called for H3K27me<sub>3</sub> or MTF2 (Fig. S1a,b). By  
199 contrast, we observed a large number of sharp JARID2 peaks with little or no occupancy of the other  
200 PRC2 subunits (Fig. S1c; cluster 3). This could indicate that JARID2 exerts functions independent of  
201 the PRC2 complex, as previously suggested in *Drosophila* (Herz et al., 2012). However, as these sites  
202 do not overlap with other PRC2 subunits, they were excluded from consideration in this context and  
203 only the remaining clusters (Fig. S1d,e) were used for subsequent analysis.

204 Next, we aimed to understand how MTF2, JARID2 and H3K27me<sub>3</sub> are involved in recruitment of  
205 PRC2. First, we focused on MTF2 and JARID2 and used knockout mESCs for these subunits  
206 (*Mtf2*<sup>GT/GT</sup> and *Jarid2*<sup>-/-</sup>, respectively). These mESCs lack MTF2 or JARID2, respectively, but  
207 globally retain wildtype levels of core PRC2 subunits, as determined by quantitative mass  
208 spectrometry (Fig. S1f). ChIP-sequencing revealed a major reduction for EZH2 and H3K27me<sub>3</sub> at  
209 target sites in *Mtf2* mutants, whereas the reduction in *Jarid2*<sup>-/-</sup> mESCs is minor (Fig. 1c,d). These  
210 observations are in line with previous reports attributing a prime role for MTF2 in PRC2 recruitment  
211 in mESCs (Li et al., 2017; Oksuz et al., 2018; Perino et al., 2018). To investigate whether PRC2.1 and  
212 PRC2.2 mediate recruitment of each other, we analysed the genomic locations bound by MTF2 and  
213 JARID2 in the knockout cells, which revealed that MTF2 and JARID2 mutually affect each other's  
214 recruitment (Fig. 1e,f), with the most profound effect of *Mtf2* knockout on JARID2 recruitment (Fig.  
215 1f). This suggests that the PRC2 sub-complexes directly or indirectly modulate their mutual  
216 recruitment. Next, to investigate the role of the allosteric EED feedback loop, we extended our  
217 analysis to wild type mESCs treated with the chemical inhibitor EED226. By binding the EED WD40  
218 domain, EED226 hampers the binding of EED to H3K27me<sub>3</sub> while simultaneously inducing a  
219 conformational change that impedes stimulation of the EZH2 catalytic activity by EED (Qi et al.,  
220 2017). Importantly, EED226 does not disturb physical associations between core PRC2 subunits (Qi  
221 et al., 2017). After confirming the complete absence of H3K27me<sub>3</sub> in EED226-treated ES cells (Fig.  
222 S1g), we performed ChIP-seq for EZH2, MTF2 and JARID2. This revealed that in the absence of  
223 H3K27me<sub>3</sub>, EZH2 and MTF2 were retained on target sites at near wild type levels (Fig. 1c,e).  
224 JARID2 binding, instead, is >50% reduced by EED226 treatment (Fig. 1f), indicating that JARID2  
225 recruitment to target sites partly relies on H3K27me<sub>3</sub>. Thus, the reduction of H3K27me<sub>3</sub> in *Mtf2*  
226 mutant cells largely explains the reduction of JARID2 binding in this cell line, whereas the effect of  
227 JARID2 on MTF2 binding, which is largely independent of the levels of H3K27me<sub>3</sub>, might rely on a  
228 direct or indirect stabilization PRC2.1 association with chromatin. Examples of typical Polycomb  
229 targets are visualized in Fig. 1g. Taken together, these data confirm previous observations that  
230 primary recruitment of PRC2 occurs largely through MTF2 (Li et al., 2017; Perino et al., 2018), show  
231 its robustness in the absence of H3K27me<sub>3</sub>, and uncover a differential dependency on H3K27me<sub>3</sub>  
232 levels for the PRC2.1 and PRC2.2 sub-complexes.

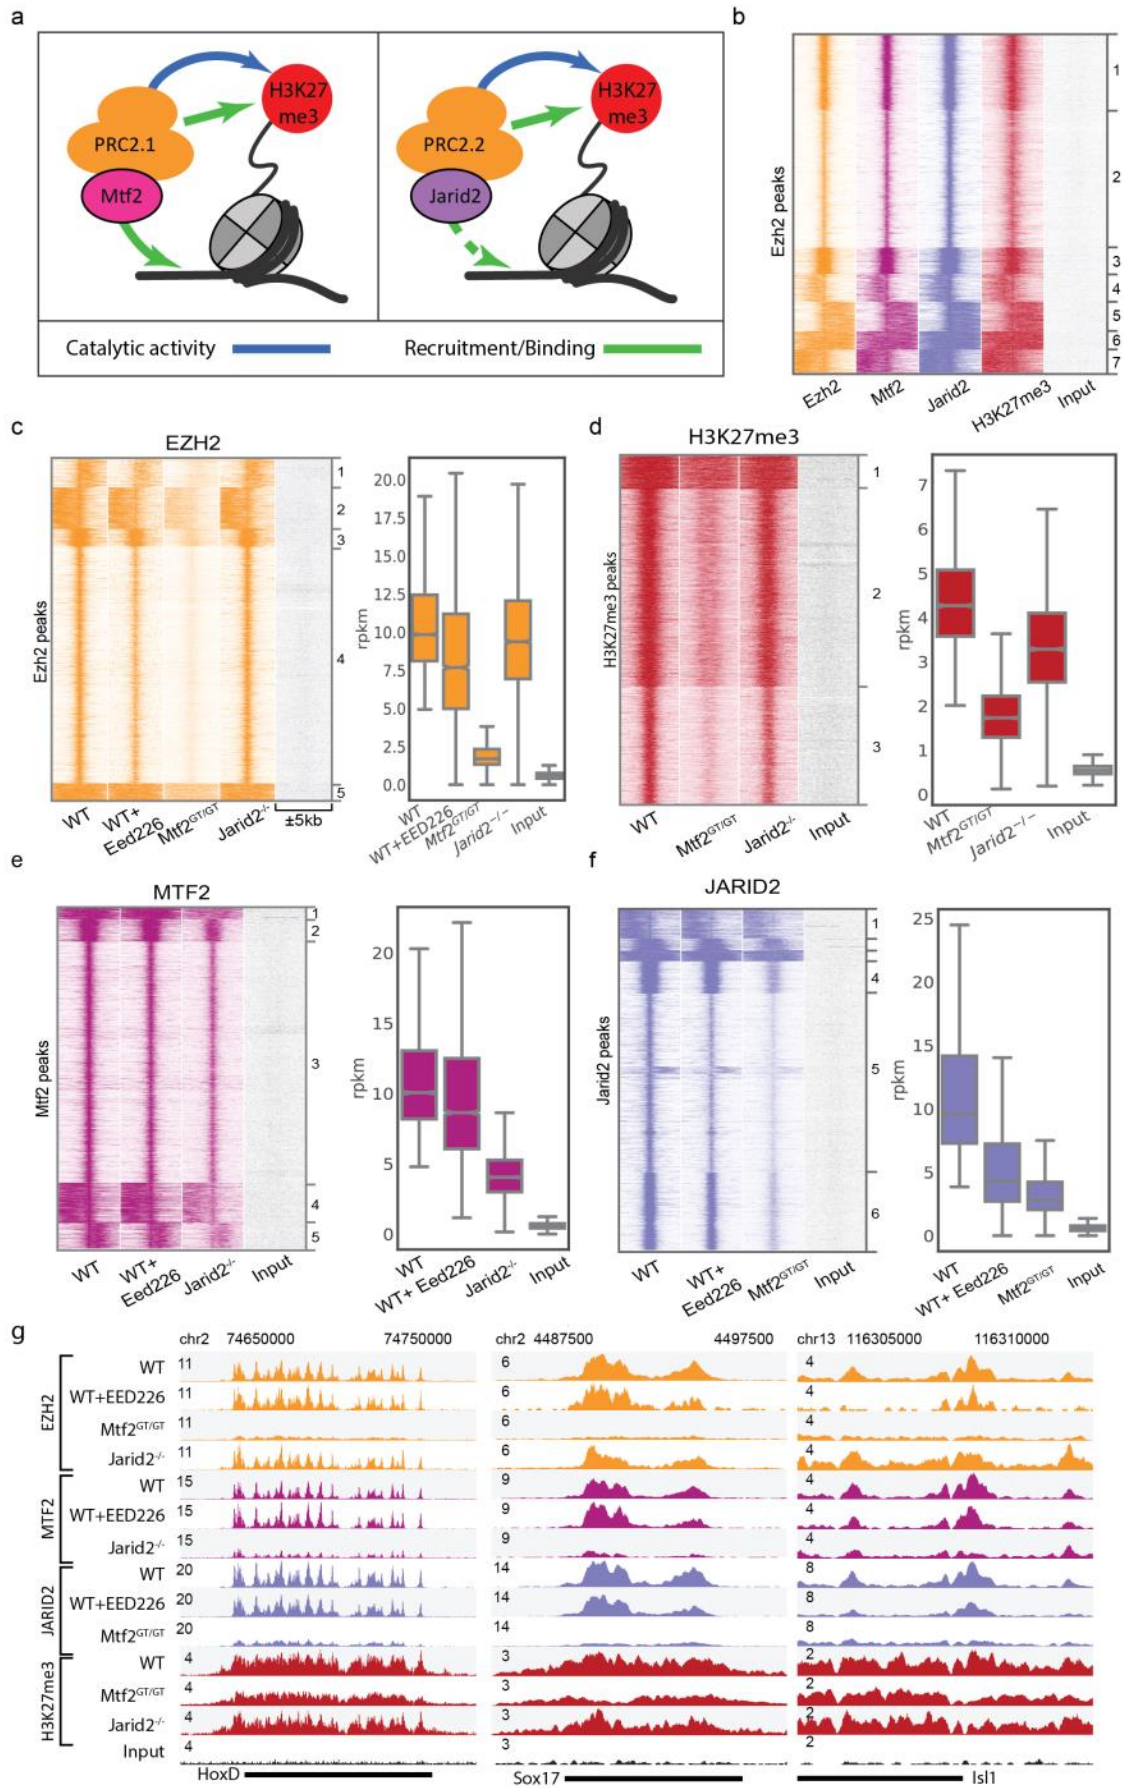

234 **Figure 1. Canonical PRC2 recruitment largely relies on MTF2.** **a)** Schematic representation of the  
235 recruitment of PRC2.1 and PRC2.2. MTF2 binds to DNA, while the EED subunit of core PRC2 (orange) binds  
236 to H3K27me3 as part of an allosteric feedback loop. The EZH2 subunit of core PRC2 catalyses H3K27  
237 methylation. The PRC2.2 complex contains JARID2 but not MTF2. Both contain the core PRC2 subunits,  
238 however the interactions of the PRC2.1 and PRC2.2-specific subunits with chromatin are different. The arrow  
239 from JARID2 to DNA is dashed as DNA binding has been shown *in vitro* but not *in vivo* (Li et al., 2010) **b)**  
240 PRC2.1 (MTF2) and PRC2.2 (JARID2) co-localize to all EZH2 targets. **c-f)** Heatmap and rpkm quantification  
241 (boxplots) of PRC2 subunits and the catalytic product H3K27me3. EZH2 recruitment is heavily affected by the  
242 absence of MTF2, while JARID2 and H3K27me3 absence have minor effects (c). The effect of MTF2 and  
243 JARID2 on EZH2 recruitment is reflected on H3K27me3 deposition (d). MTF2 is marginally affected by  
244 H3K27me3 removal, but its binding is reduced to approximately half the WT level in the absence of JARID2  
245 (e). JARID2 recruitment is strongly reduced in the absence of either H3K27me3 or MTF2 (f). ChIP profiles are  
246 highly reproducible (Fig S1h) **g)** Genome browser examples of PRC2 binding to classical Polycomb targets.  
247 Box plots represent median and interquartile range (IQR; whiskers, 1.5 IQR).

248

### 249 **Stratification of Polycomb binding sites reveals two major types of targets**

250 We noticed that several of the clusters observed in Figure 1 showed distinct characteristics, such as  
251 the strength of binding or the width of the peaks (for example cluster 4 and 5 of the EZH2 ChIP-seq,  
252 Fig. 1c). Moreover, the consequences of removal of MTF2 or JARID2 appear different per cluster  
253 (c.f. the effect of MTF2 removal of cluster 2 and 4 in Fig. 1c, and cluster 3 and 5 in Fig. 1f, or the  
254 effect of JARID2 on clusters 2 and 5 in Fig. 1e). Furthermore, recent work implied that recruitment of  
255 MTF2 relies on the physical presence of EED only in a subset of PRC2 targets (Perino et al., 2018),  
256 which supports a hypothesis in which distinct modes of recruitment guide PRC2 to different genomic  
257 regions. To understand if and how PRC2 recruitment might be distinct depending on the genomic loci  
258 analysed, we included in our analysis MTF2 ChIP-seq data of mESCs lacking EED (Perino et al.,  
259 2018) (and therefore lacking the PRC2 core), BioCap data to identify regions free of DNA  
260 methylation (Long et al., 2013) (which is common for Polycomb targets and required for MTF2  
261 binding to DNA (Perino et al., 2018)), and H3K4me3 ChIP-seq data of wild type ESCs (to identify  
262 bivalent promoter elements (Perino et al., 2018) that comprise the majority of Polycomb targets in  
263 mESCs (Brookes et al., 2012)). We combined these data with those shown in Figure 1 and clustered  
264 them on the common set of PRC2-bound regions, revealing six major clusters (Fig. 2a). Clusters 1-4  
265 display strong BioCap and H3K4me3 signals and are likely bivalent promoters (Bernstein et al.,  
266 2006), whereas clusters 5-6 show relatively low BioCap and H3K4me3 signals and could comprise  
267 silenced genes. We observed that the consequences of the perturbations for PRC2 recruitment varied  
268 per cluster (Fig. 2b, S2a). A notable example includes the H3K27me3 signal, which is affected more  
269 in clusters 1-4 (reduced to 6-27%) compared to cluster 5-6 (48-56%) in *Mtf2<sup>GT/GT</sup>* ESCs (Fig. 2b, top  
270 right). Similar patterns hold true for EZH2 (Fig. 2b, top left; 9-12% versus 23-26%) and JARID2  
271 recruitment (Fig. 2b, bottom right; 11-19% versus 30-34%). In addition, removal of EED results in  
272 very strong reduction of MTF2 recruitment in all clusters. We recently found that MTF2 is recruited  
273 to CpGs in the context of a specific shape of the DNA, characterized by reduced helix twist (Perino et  
274 al., 2018). Therefore, we analysed the DNA shape of the genomic sequences in each cluster. This  
275 revealed that shape-matching GCG trinucleotides are much more prevalent in cluster 1-4 (Fig. 2c),  
276 which fits the higher dependence of MTF2 for PRC2 recruitment in these clusters (Perino et al.,  
277 2018). Together, these analyses indicate that cluster 1-4 rely relatively more on MTF2-mediated  
278 recruitment compared to cluster 5-6.

279 As previous reports suggested that Polycomb target sites contain distinct gene sets (Brookes et al.,  
280 2012), we tested whether cluster 1-4 and 5-6 also consisted of different sets of genes. When  
281 comparing with all the mouse genes, we observed that every cluster was enriched for genes associated  
282 with the development of body structures (Fig. S2b), as is characteristic for Polycomb genes in general  
283 (Brookes et al., 2012). Next, we stratified the clusters by calculating the enrichment among PRC2



284 targeted genes. We observed that cluster 5 and 6 are strongly enriched for genes related to body plan,  
 285 limb, mesenchyme and branchial arches development (Fig. 2d), while cluster 2 and 4 show a stronger  
 286 enrichment for neural structures (Fig. 2d). In addition, all Hox genes, which are considered highly  
 287 conserved master regulators of embryonic development, are exclusively present in cluster 5-6.  
 288 Collectively, these analyses identify two distinct classes of Polycomb target regions.

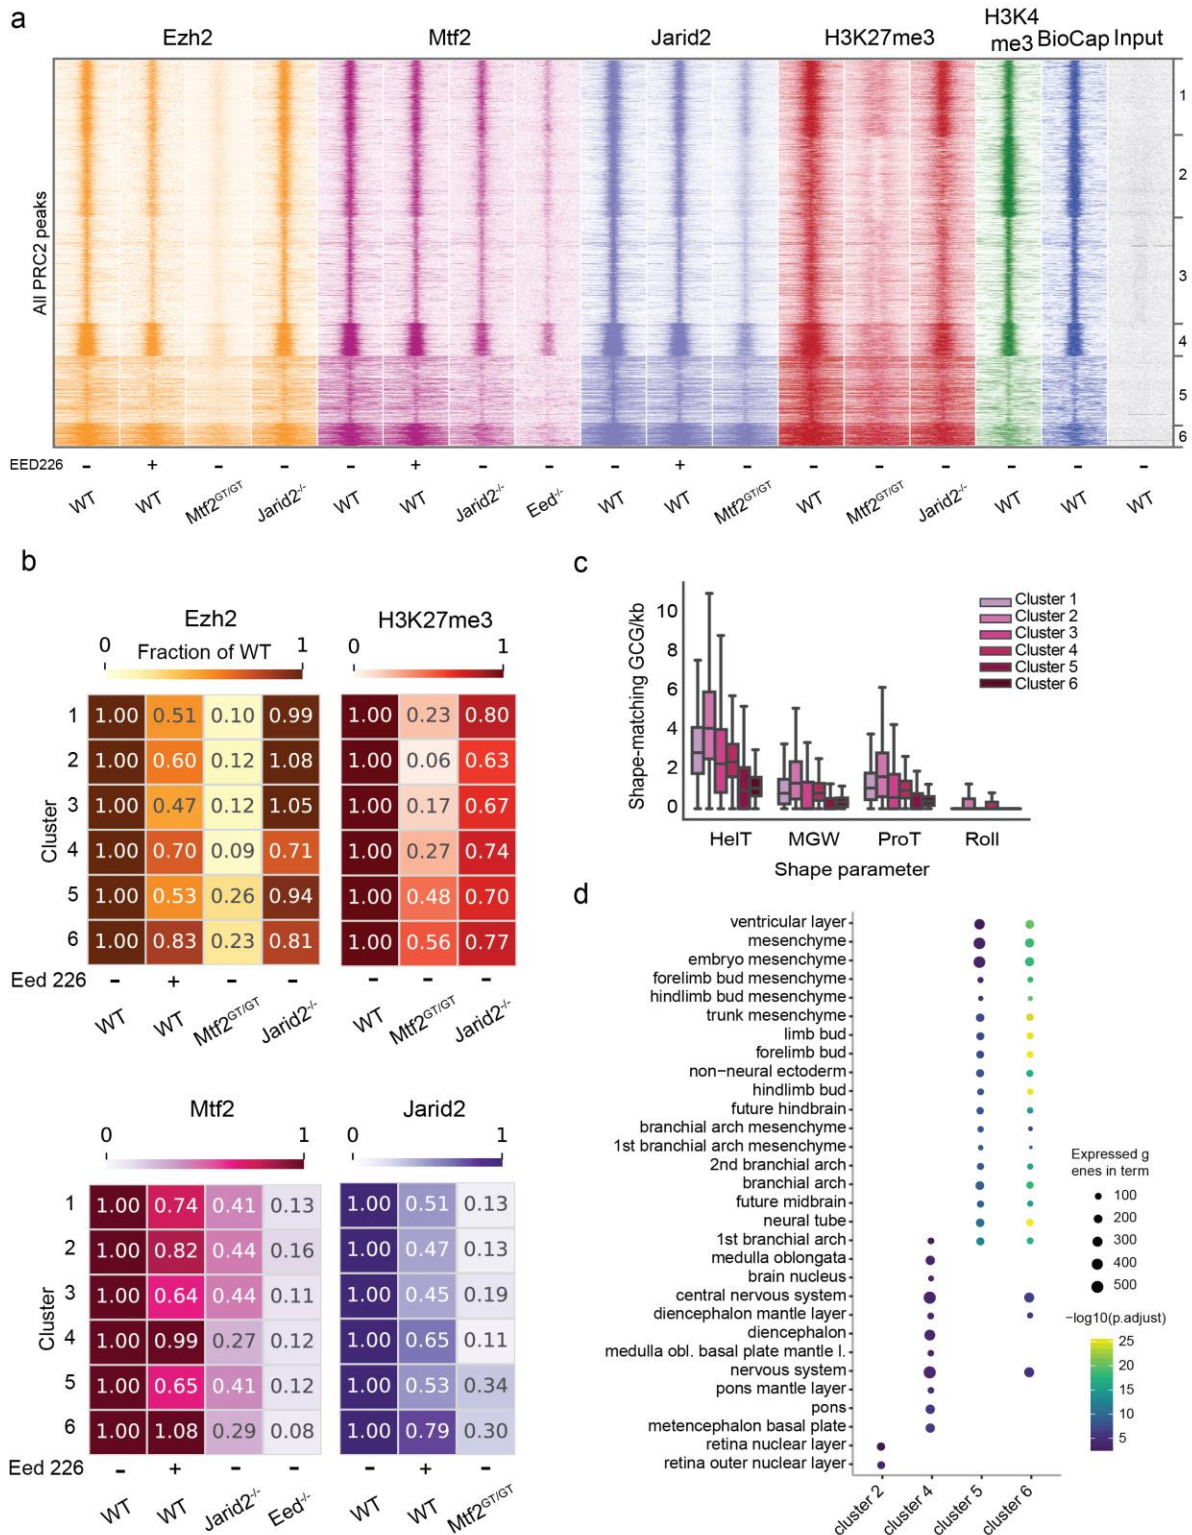

289

290 **Figure 2. Identification of two distinct classes of Polycomb target regions, which rely on different**  
 291 **mechanisms of PRC2 recruitment.** a) Clustering of all PRC2 targets using ChIPseq data in multiple PRC2

292 mutants. Cluster 1-4 are unmethylated CpG islands (strong BioCap) signal, showing bivalent marks in WT  
293 (H3K4me3 and H3K27me3). These regions display heavy reduction of EZH2 recruitment in the MTF2 mutant,  
294 milder effects of H3K27me3 absence (EED226 treatment), and little or no effect of JARID2 absence. The  
295 intensity of MTF2 binding depends on both H3K27me3 and JARID2 but binding is still clearly detectable even  
296 in the absence of PRC2 core (*Eed*<sup>-/-</sup>) indicating a primary binding to DNA, reinforced by other mechanisms,  
297 such as JARID2-mediated recruitment, which in turn also depends on both H3K27me3 and MTF2. Cluster 5 and  
298 6 have lower BioCap and H3K4me3 signal, and, while still affected by the absence of MTF2, this has a much  
299 less marked effect on recruitment of both EZH2 and JARID2, and on H3K27me3 deposition. **b)** WT-  
300 normalized, input-subtracted RPKM quantification of signal shown in (a). **c)** Quantification of GCG  
301 trinucleotides matching DNA shape requirement for MTF recruitments as defined in Perino et al, 2018. Cluster  
302 1-4 are strongly enriched in shape-matching GCGs, indicating potential for strong DNA-mediated MTF2  
303 recruitment. **d)** Enrichment of anatomical terms in the genes associated with peaks in the six clusters.  
304 Enrichment within PRC2 targets. Cluster 4 show strong enrichment for CNS structures, cluster 5 and 6 for limb  
305 and branchial arches tissues and mesenchyme. See Fig S2b for the full overview.

306

### 307 **JARID2 and H3K27me3 are redundant for PRC2 recruitment**

308 Our analyses allowed us to investigate the individual contributions of MTF2, JARID2 and H3K27me3  
309 for PRC2 recruitment. However, ablation of single subunits individually does not exclude the  
310 possibility of compensation by other factors. Thus, we combined knockouts of MTF2 and JARID2  
311 with inhibition of H3K27 methylation. We treated *Mtf2*<sup>GT/GT</sup> ESCs with EED226 to remove  
312 H3K27me3, only leaving JARID2-mediated recruitment intact. Similarly, we combined removal of  
313 JARID2 with EED226 treatment, which leaves only the contribution of MTF2-mediated recruitment  
314 (cf. Fig 1a). In both situations, treatment with EED226 resulted in the complete removal of  
315 H3K27me3 (Fig S3). We examined the effect on core PRC2 recruitment to target genes by  
316 performing ChIP-sequencing of EZH2 in *Mtf2*<sup>GT/GT</sup>+EED226 ESCs and *Jarid2*<sup>-/-</sup>+EED226 mESCs.  
317 Inspection of the EZH2 signal revealed a relatively minor further decrease of EZH2 recruitment in  
318 *Mtf2*<sup>GT/GT</sup>+EED226 mESCs, compared to the already severe phenotype caused by MTF2 depletion  
319 alone (Fig 3a,b). Interestingly, although the absence of JARID2 alone had no effect (Fig. 3a,b;  
320 clusters 1-3, 5) or only a moderate effect (Fig. 3a,b; clusters 4, 6) on EZH2 recruitment, and the  
321 absence of H3K27me3 resulted in only a modest effect in all clusters, their combined ablation resulted  
322 in a dramatic decrease of EZH2 recruitment (Fig 3a,b). This could suggest that JARID2 and  
323 H3K27me3 are redundant for PRC2 recruitment or can compensate for each other. In addition, this  
324 demonstrates that MTF2-mediated recruitment by itself is not sufficient to establish full Polycomb  
325 recruitment, but requires PRC2.2 and/or the EED feedback loop. We extended our analyses by  
326 performing ChIP-sequencing for JARID2 in *Mtf2*<sup>GT/GT</sup>+EED226 mESCs and for MTF2 in *Jarid2*<sup>-/-</sup>  
327 +EED226 mESCs. Removal of both JARID2 and H3K27me3 further reduced MTF2 recruitment, and  
328 especially in cluster 5-6 MTF2 recruitment was near-zero (Fig 3c-e). This shows that these loci recruit  
329 MTF2 (PRC2.1) indirectly through PRC2.2 and the EED-positive feedback loop. This is in agreement  
330 with the observations that the loci in these clusters do not recruit MTF2 in the absence of PRC2 (*Eed*  
331 <sup>-/-</sup> mESCs) and do not show any enrichment for GCG trinucleotides with a DNA shape preferred by  
332 MTF2 (Fig 2a,d). When focusing on JARID2 in *Mtf2*<sup>GT/GT</sup>+EED226 ESCs, we observed a reduction of  
333 recruitment in all clusters although the decrease was marginally stronger in cluster 5-6 (Fig 3d).  
334 Together, these data uncover an important contribution of the EED-H3K27me3 interaction to PRC2  
335 recruitment, in particular for PRC2.2, and show that the relative importance of PRC2.1 and PRC2.2  
336 differs across the genome.

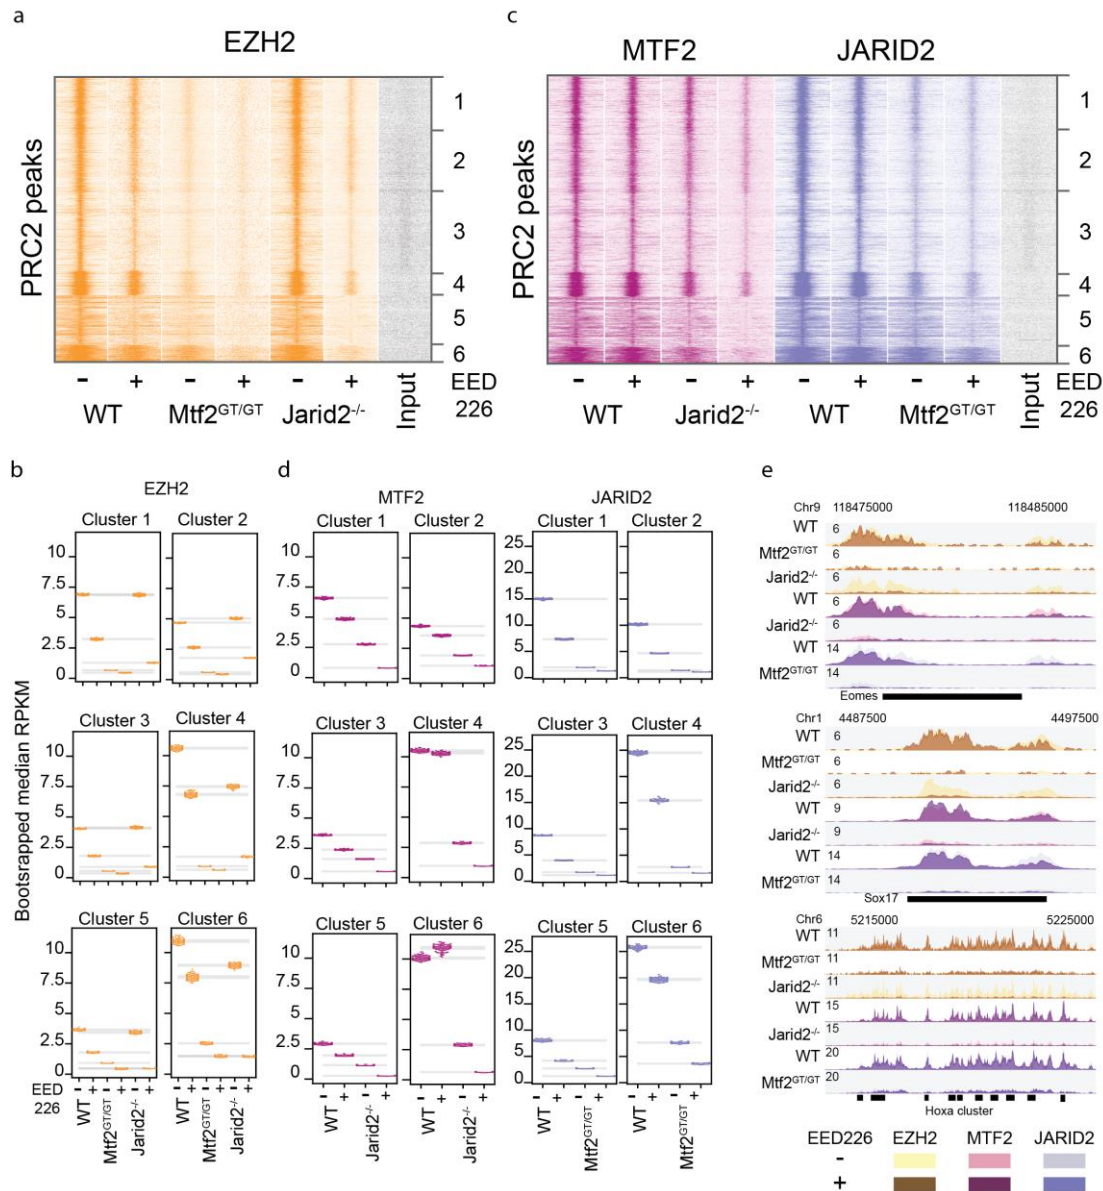

337

338 **Figure 3. The H3K27me3 feedback loop and JARID2 are mutual backup for PRC2 recruitment. a)**  
 339 Heatmap showing the cluster specific effect of H3K27me3 depletion on the binding of EZH2. WT and  
 340  $Mtf2^{GT/GT}$  show mild reduction of EZH2 binding when treated with EED226 inhibitor, while the treatment is  
 341 highly synergistic with the depletion of JARID2. **b)** Bootstrapping-based RPKM quantification (methods) of the  
 342 signal in (a). Each coloured dot represent the median of one round of bootstrapping, grey bar represent 99.9%  
 343 confidence interval for the mean of bootstrapped values in each condition and cluster. **c)** Treatment with  
 344 EED226 further affected MTF2 recruitment in  $Jarid2^{-/-}$  and JARID2 recruitment in  $Mtf2^{GT/GT}$ , with the former  
 345 leading to recruitment pattern closely resembling the  $Eed^{-/-}$  line (cf. Fig2a), highlighting the recruitment  
 346 differences between cluster 1-4 and 5-6. **d)** Bootstrapping-based RPKM quantification (methods) of the signal  
 347 in (c) similar as in 3b. **e)** Genome browser view of example Polycomb targets. For each genotype two tracks are  
 348 overlaid: the darker colour represent EED226 treated samples, the lighter colour untreated cells.

349

### 350 JARID2 recruitment is largely dependent on PRC1

351 Our analyses indicate that the allosteric feedback loop mediated by EED seems to directly or  
 352 indirectly buffer the absence of JARID2 and vice versa. We hypothesized this could be mediated



353 through PRC1, as the catalytic subunit RING1B can deposit H2AK119ub which can in turn mediate  
354 JARID2 recruitment (Blackledge et al., 2014; Cooper et al., 2016). As PRC1-dependent PRC2  
355 recruitment is mediated through H2AK119ub and JARID2, a scenario in which H3K27me3 and  
356 H2AK119ub are simultaneously absent might phenocopy the effect of *Jarid2*<sup>-/-</sup>+EED226 ESCs. To  
357 test this, we used *Ring1a/b* double mutant mESCs treated with EED226 (*Ring1a/b*<sup>-/-</sup>+EED226) and  
358 performed ChIP-sequencing of EZH2, MTF2 and JARID2 in these ESCs. Interestingly, we observed  
359 that the EZH2 and MTF2 profiles obtained in *Jarid2*<sup>-/-</sup>+EED226 and *Ring1a/b*<sup>-/-</sup>+EED226 were  
360 almost indistinguishable (Fig 4a-c, light and dark blue lines in Fig. 4b, Fig S4), and also JARID2  
361 binding was affected in *Ring1a/b*<sup>-/-</sup>+EED226 cells (Fig 4d, Fig S4). Of note, while the residual  
362 JARID2 recruitment in *Ring1a/b*<sup>-/-</sup>+EED226 and *MTF2*<sup>GT/GT</sup>+EED226 is comparable for cluster 1-4,  
363 cluster 5-6 seems to depend more on PRC1 and on PRC2.2 (Fig 4d lower panels, Fig S4), further  
364 supporting a minor role to MTF2 for PRC2 recruitment at these locations. These observations strongly  
365 suggest that JARID2 and PRC1 act along same recruitment axis. As low levels of residual JARID2  
366 recruitment is observed in clusters 1-4 in the *Ring1a/b*<sup>-/-</sup>+EED226 condition, additional mechanisms  
367 might recruit JARID2, for example binding of JARID2 to DNA (Li et al., 2010) or RNA (Brockdorff,  
368 2013; Kaneko et al., 2014). To extend our analysis on PRC1-PRC2 interdependencies and disentangle  
369 the roles of H3K27me3 versus PRC2 subunits in PRC1 recruitment, we performed RING1B ChIP-seq  
370 in WT, *MTF2*<sup>GT/GT</sup>, and *Jarid2*<sup>-/-</sup> in the presence of EED226. Removal of H3K27me3 in wild type  
371 ESCs had only limited effect on RING1B recruitment (Fig 4e-g, Fig S5). However, the combined  
372 absence of H3K27me3 and either MTF2 or JARID2 results in strong reduction of RING1B binding  
373 (Fig 4e-g). While the Polycomb dogma posits that PRC1 and PRC2 do not physically interact and  
374 mutually affect each other only via their catalytic products (respectively H2AK119ub and  
375 H3K27me3), these data suggest that PRC2 also contributes to PRC1 recruitment independently of  
376 H3K27me3. For example, it is conceivable that the physical presence of PRC2 at target genes (which  
377 is strongly reduced in *Mtf2*<sup>GT/GT</sup>+EED226 and *Jarid2*<sup>-/-</sup>+EED226 ESCs) stabilizes PRC1 binding to  
378 chromatin by affecting chromatin compaction (Isono et al., 2013).



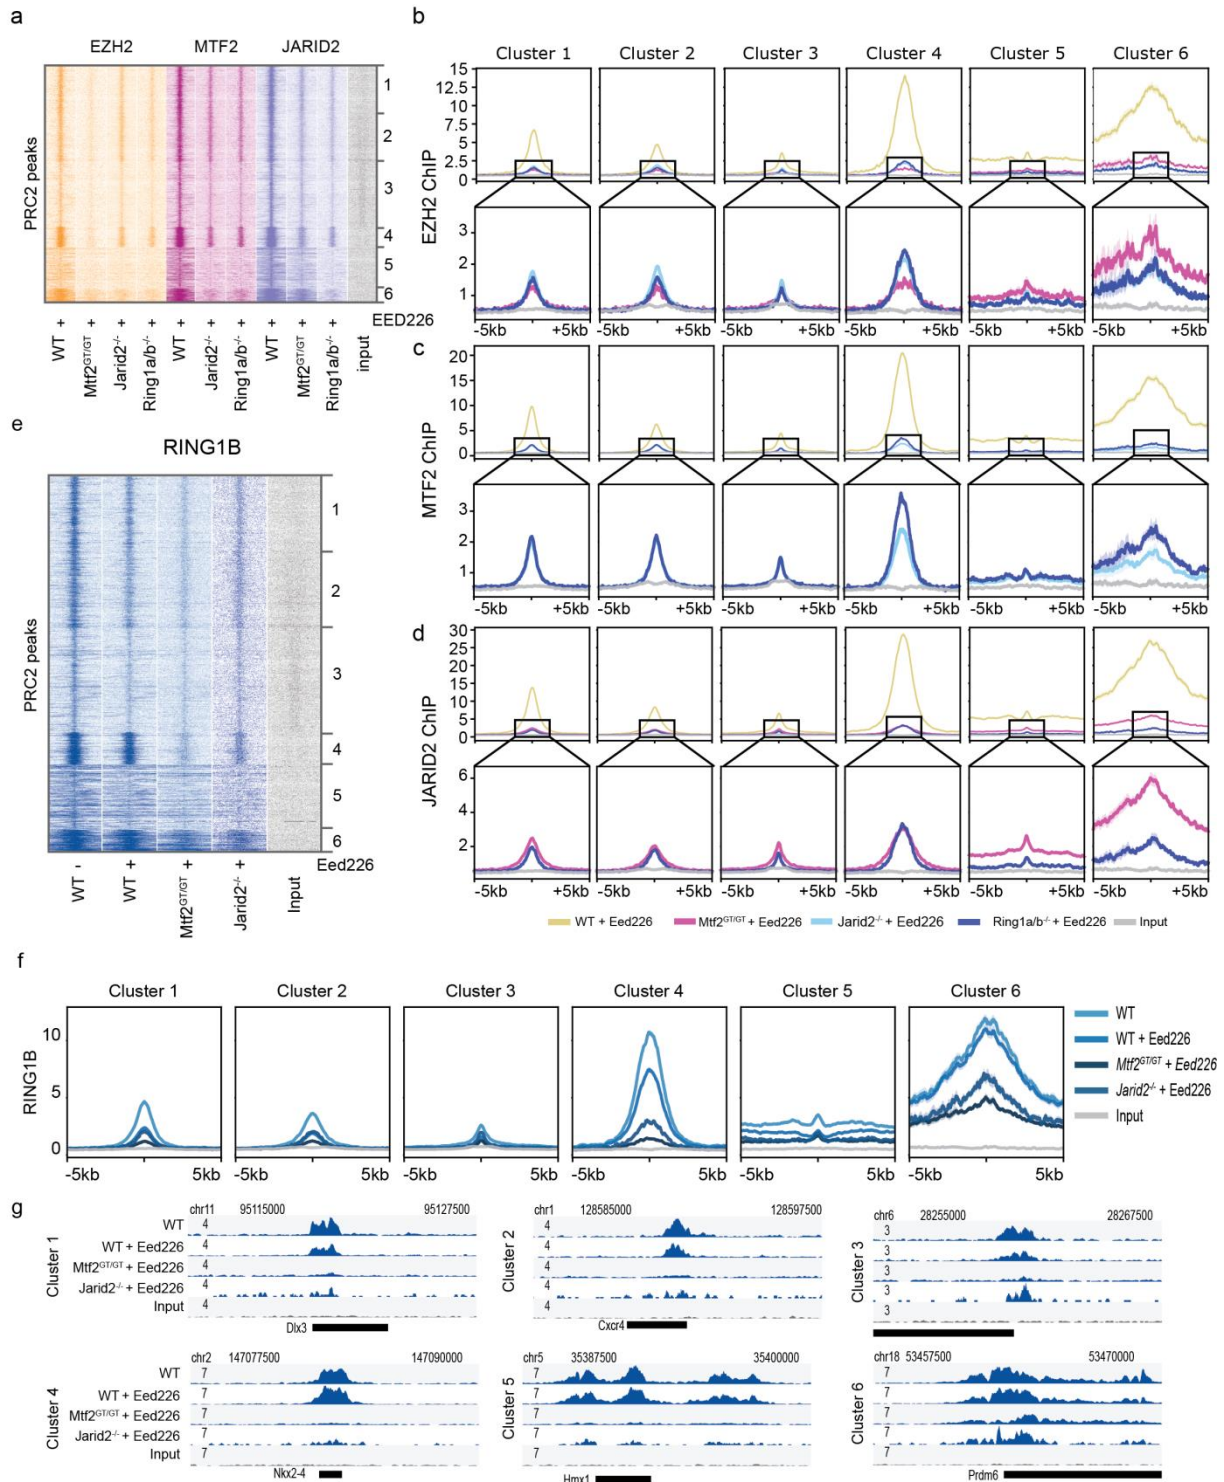

379

380 **Figure 4. JARID2 recruitment is largely dependent on PRC1.** **a)** Heatmap showing EZH2, MTF2 and  
 381 JARID2 binding in the absence of H3K27me3 in PRC2 and PRC1 mutant lines. In the absence of H3K27me3,  
 382 JARID2 and RING1A/B mutant phenocopy each other with regard to EZH2 and MTF2 binding, suggesting  
 383 JARID2 and RING1B act in the same PRC2 recruitment mechanism. JARID2 recruitment is also strongly  
 384 affected by the absence of RING1A/B, in line with the JARID2-mediated PRC2 recruitment via binding to  
 385 PRC1-deposited H2AK119ub. **b-d)** Average plot of the ChIP signal shown in (a), for EZH2 (b) MTF2 (c) and  
 386 JARID2 (d) centred on called peaks. Lower panels represent the same data with cropped y axis, for better  
 387 visualization. **e)** Heatmap showing Ring1b binding in the discussed conditions. Ring1b is only mildly affected  
 388 by removing H3K27me3 using EED226 (~40%). Binding is further attenuated in MTF2 and JARID2 mutant

389 ESCs. **f)** Average plot of the ChIP signal shown in (e), centred on called peaks. **g)** Examples of loci of the data  
 390 as shown in (e).

391

392 **PRC2 recruitment is mediated through a combined action of PRC2.1 and PRC2.2**

393 Finally, we investigated whether the residual EZH2 recruitment observed in *Ring1a/b*<sup>-/-</sup>+EED226 and  
 394 *Jarid2*<sup>-/-</sup>+EED226 mESCs was mediated through MTF2. To do so, we used *Mtf2*<sup>GT/GT</sup> ESCs in which  
 395 we removed H3K27me3 using EED226 and additionally H2AK119ub using MG132 (Tavares et al.,  
 396 2012) (*MTF2*<sup>GT/GT</sup>+d.i.; double inhibition), and performed ChIP-sequencing for EZH2. In this triple  
 397 ablation condition, the recruitment of EZH2 to target genes was completely abrogated in all clusters  
 398 (input levels, Fig 5, Fig S5). Collectively, these analyses demonstrate that the combined action of  
 399 MTF2, the allosteric EED feedback loop and PRC1-mediated recruitment of JARID2-containing  
 400 PRC2 sub-complexes are required for PRC2 recruitment in mESCs.

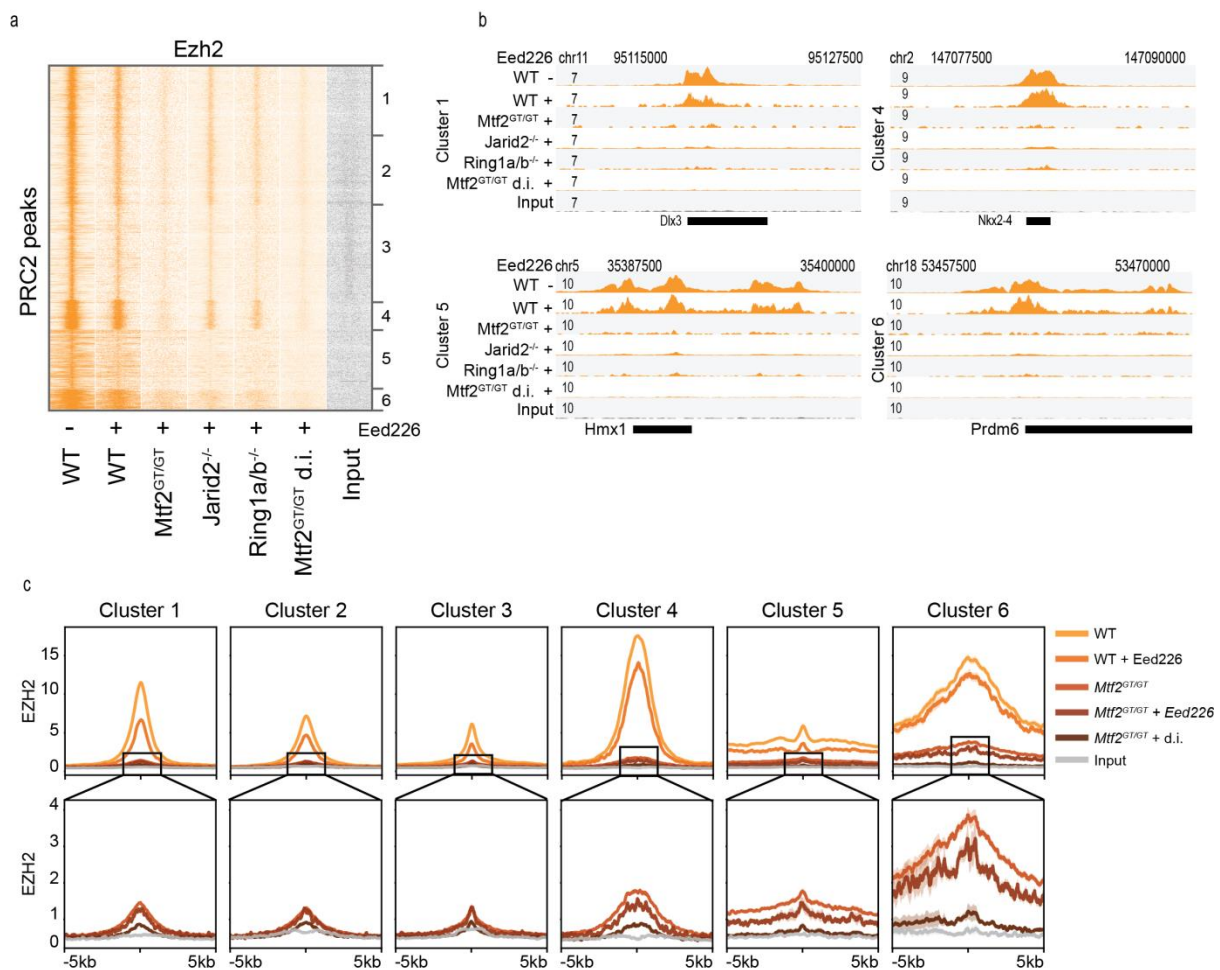

401

402 **Figure 5. EZH2 recruitment depends on MTF2, H3K27me3 and H2AK119ub.** **a)** Heatmap of ChIP-seq  
 403 signal for EZH2 in multiple conditions including *Mtf2*<sup>GT/GT</sup> cells with double inhibition (d.i.) using EED226 (to  
 404 remove H3K27me3) and MG132 (to remove H2AK119ub). **b)** Example loci of the data shown in (a). **c)**  
 405 Average profiles of the ChIP signal shown in (a), centred on called peaks. Lower panels represent the same data  
 406 with cropped y axis, for better visualization.

407

## 408 Discussion

409 The mechanisms that guide and maintain PRC2 at target sites have been the focus of extensive  
410 research, yet have long remained enigmatic. Although the allosteric feedback loop mediated by EED  
411 is important for spreading of PRC2 away from its initial nucleation site (Margueron et al., 2009), the  
412 mere presence of H3K27me3 is not sufficient to maintain PRC2 at its target genes (Laprell et al.,  
413 2017). This indicates that continuous DNA-mediated and Polycomb target-specific recruitment or  
414 stabilization is required to attract PRC2 to newly replicated chromatin fibres (Laprell et al., 2017).  
415 The recent discoveries of facultative PRC2 subunits and the presence of functionally distinct sub-  
416 complexes has greatly advanced our understanding of PRC2 recruitment and maintenance (Hauri et  
417 al., 2016; Smits et al., 2013). In particular, individual ablation of all prime facultative subunits in  
418 ESCs revealed a major role for MTF2 in PRC2 recruitment which, together with JARID2, mediates  
419 the initial PRC2 binding to the initiation sites ('nucleation sites') (Li et al., 2010, 2017; Oksuz et al.,  
420 2018; Perino et al., 2018).

421 In this study, we have dissected the various mediators of PRC2 recruitment. Our analyses confirm  
422 previous observations that MTF2 is required for a significant proportion of PRC2 recruitment (Li et  
423 al., 2017; Perino et al., 2018) and extend recent work highlighting that the remaining recruitment is  
424 mediated mostly via JARID2 (Oksuz et al., 2018). We show that MTF2 and JARID2 mutually  
425 modulate each other's recruitment, partly through the EED feedback loop and in part through PRC1.  
426 Our work uncovers significant buffering and positive feedback in recruitment of PRC2. There are two  
427 main functional axes of primary PRC2 recruitment in mESCs, working through MTF2 and JARID2-  
428 PRC1, both of which are enforced by H3K27me3-EED positive feedback. The relative weight of  
429 these two mechanisms, however, depends on the genomic location (Fig 6). Polycomb target regions  
430 can indeed be sub-divided into (at least) two major categories. The largest group (in this study cluster  
431 1-4 from Fig 2a onwards) contains mainly bivalent genes which rely more on PRC2.1-mediated  
432 recruitment. At these locations, a limited amount of MTF2 is sufficient to kick start recruitment,  
433 which is reinforced by EED feedback loop and PRC2.2, with partially redundant effects. Therefore,  
434 only combined ablation of both JARID2 and H3K27me3 dampens recruitment to the levels mediated  
435 by primary MTF2-dependent recruitment alone. Hence the simultaneous absence of MTF2,  
436 H3K27me3 and H2AK119ub is required to abolish all core PRC2 enrichment from target regions in  
437 mESCs. The smaller group (in this study cluster 5-6), instead, relies more on PRC1 and PRC2.2, and  
438 contains very lowly expressed and developmentally relevant genes such as all the Hox genes. Here,  
439 PRC1 activity is required to induce JARID2 and PRC2.2 recruitment, providing an alternative  
440 recruitment path to MTF2-dependent binding described above. MTF2 still binds to these locations,  
441 but does so indirectly, as shown by the loss of MTF2 in *Eed*<sup>-/-</sup>, *Jarid2*<sup>-/-</sup> +EED226 and *Ring1b*<sup>-/-</sup>  
442 +EED226, and supported by the sparse presence of DNA shape-permissive CG sequences,  
443 insufficient to achieve sustained DNA-driven MTF2 recruitment.

444 Beside the more intuitive effect of MTF2 on JARID2 recruitment, we also observed that JARID2  
445 depletion affects MTF2 binding, but this is only partially mediated via H3K27me3, as shown by EED  
446 inhibition. Intriguingly, while affecting MTF2, the absence of JARID2 alone has a minimal effect on  
447 EZH2 recruitment. A potential explanation could be that hybrid PRC2.1/2.2 complexes containing  
448 AEBP2 and MTF2 form under these conditions, similarly to the JARID2-MTF2-containing hybrid  
449 complexes in AEBP2 mutant mESCs (Grijzenhout et al., 2016). The formation of hybrid complexes  
450 could sequester the complex or inhibit MTF2 recruitment.

451 The observations in the current study further substantiate previous work showing that the role of  
452 PRC1 and PRC2 are large intertwined, as both complexes can be recruited independently, but  
453 simultaneously modulate their mutual recruitment (Blackledge et al., 2014; Morey et al., 2013;  
454 Tavares et al., 2012). Our analyses of EED226-treated mESCs reveals that ~40% of PRC1 recruitment  
455 depends on the presence of H3K27me3 (Fig 4e-f), probably through canonical complexes containing



456 CBX7 (Morey et al., 2012, 2013). The remainder of PRC2-independent PRC1 is likely recruited via  
 457 KDM2B-mediated DNA binding, which is in line with previous observations showing that ~60% of  
 458 RING1B recruitment is mediated by KDM2B (Farcas et al., 2012; Wu et al., 2013). Surprisingly, our  
 459 analyses reveal that MTF2 and JARID2 deficient mESCs treated with EED226 show a more profound  
 460 decrease (> ~40%) of RING1B occupancy at target genes. This could indicate either an as of yet  
 461 unknown link between PRC1 and PRC2, or alternatively, a stabilization of KDM2B-mediated  
 462 recruitment to DNA by the physical presence of core PRC2, that would increase the residence time of  
 463 PRC1 on chromatin (Oksuz et al., 2018). Together, these observations further corroborate the  
 464 hypothesis that PRC1 and PRC2 can bind autonomously, but are synergistic for their reciprocal  
 465 recruitment.

466 Collectively, the observations here provide novel insights into Polycomb recruitment in ESCs and  
 467 provide a model in which PRC2 recruitment can be initiated solely through direct recruitment via  
 468 DNA, after which PRC2.1/PRC2.2 and PRC2/PRC1 functional interactions are required to achieve  
 469 the full establishment of Polycomb binding through self- and mutual reinforcement.

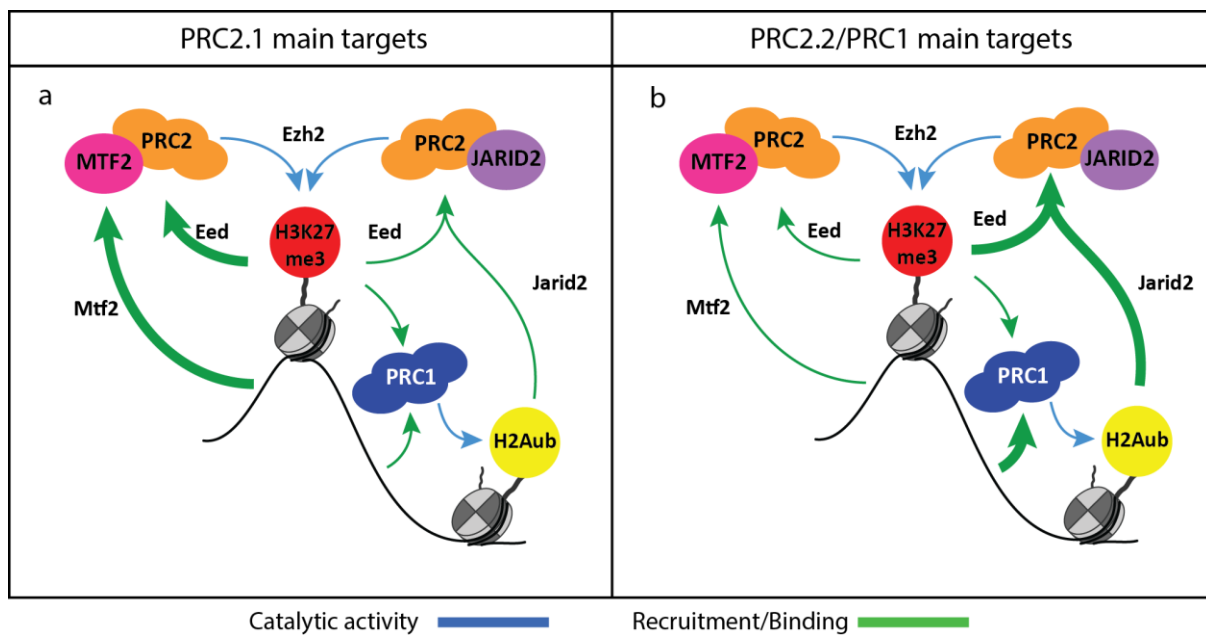

470

471 **Figure 6. Model of PRC2 recruitment mechanisms and interactions. a)** On PRC2.1 main targets (clusters 1-  
 472 4) relatively little MTF2 binding is sufficient to kick start the EED positive feedback loop which heavily relies  
 473 on JARID2. As primary recruitment is mediated to a large extent via MTF2, such a loop can still exist in the  
 474 absence JARID2. In the absence of H3K27me3, an alternative route can take over that requires JARID2 binding  
 475 to H2AK119ub. **b)** On PRC2.2/PRC1 targets (clusters 5-6), instead, Polycomb binding is initiated by PRC1 that,  
 476 upon H2AK119ub deposition, is followed by JARID2-containing PRC2.2. These regions also see the presence  
 477 of MTF2 in physiological conditions, but this is the result of indirect recruitment via the PRC2 core binding to  
 478 PRC2.2-initiated H3K27me3 deposition.

479



480 **Acknowledgements**

481 This work has been financially supported by the People Program (Marie Curie Actions) of the  
482 European Union's Seventh Framework Program FP7 under grant agreement number 607142  
483 (DevCom). G.v.M. is supported by the Oncode Institute, which is partly funded by the Dutch Cancer  
484 Society (KWF). H.M. is supported by the Netherlands Organisation for Scientific Research (NWO-  
485 VIDI 864.12.007). This work was carried out on the Dutch national e-infrastructure with the support  
486 of SURF Cooperative.

487 **Data availability**

488 New and reanalysed published data are available via GEO (in submission), proteomics data via  
489 PRIDE (in submission). Normalized sequencing tracks can be browsed by loading the following track  
490 hub to the UCSC genome browser (XXX).

491

## 492 References

- 493 Beringer, M., Pisano, P., Di Carlo, V., Blanco, E., Chammas, P., Vizán, P., Gutiérrez, A., Aranda, S.,  
494 Payer, B., Wierer, M., et al. (2016). EPOP Functionally Links Elongin and Polycomb in Pluripotent  
495 Stem Cells. *Mol. Cell* *64*, 645–658.
- 496 Bernstein, B.E., Mikkelsen, T.S., Xie, X., Kamal, M., Huebert, D.J., Cuff, J., Fry, B., Meissner, A.,  
497 Wernig, M., Plath, K., et al. (2006). A Bivalent Chromatin Structure Marks Key Developmental  
498 Genes in Embryonic Stem Cells. *Cell* *125*, 315–326.
- 499 Blackledge, N.P., Farcas, A.M., Kondo, T., King, H.W., McGouran, J.F., Hanssen, L.L.P., Ito, S.,  
500 Cooper, S., Kondo, K., Koseki, Y., et al. (2014). Variant PRC1 complex-dependent H2A  
501 ubiquitylation drives PRC2 recruitment and polycomb domain formation. *Cell* *157*, 1445–1459.
- 502 Brockdorff, N. (2013). Noncoding RNA and Polycomb recruitment. *RNA* *19*, 429–442.
- 503 Brookes, E., De Santiago, I., Hebenstreit, D., Morris, K.J., Carroll, T., Xie, S.Q., Stock, J.K.,  
504 Heidemann, M., Eick, D., Nozaki, N., et al. (2012). Polycomb associates genome-wide with a specific  
505 RNA polymerase II variant, and regulates metabolic genes in ESCs. *Cell Stem Cell* *10*, 157–170.
- 506 Casanova, M., Preissner, T., Cerase, A., Poot, R., Yamada, D., Li, X., Appanah, R., Bezstarosti, K.,  
507 Demmers, J., Koseki, H., et al. (2011). Polycomblike 2 facilitates the recruitment of PRC2 Polycomb  
508 group complexes to the inactive X chromosome and to target loci in embryonic stem cells.  
509 *Development* *138*, 1471–1482.
- 510 Conway, E., Jerman, E., Healy, E., Ito, S., Holoch, D., Oliviero, G., Deevy, O., Glancy, E.,  
511 Fitzpatrick, D.J., Mucha, M., et al. (2018). A Family of Vertebrate-Specific Polycombs Encoded by  
512 the LCOR/LCORL Genes Balance PRC2 Subtype Activities. *Mol. Cell* *70*, 408–421.e8.
- 513 Cooper, S., Grijzenhout, A., Underwood, E., Ancelin, K., Zhang, T., Nesterova, T.B., Anil-  
514 Kirmizitas, B., Bassett, A., Kooistra, S.M., Agger, K., et al. 13661, (2016). Jarid2 binds mono-  
515 ubiquitylated H2A lysine 119 to mediate crosstalk between Polycomb complexes PRC1 and PRC2.  
516 *Nat. Commun.* *7*.
- 517 Endoh, M., Endo, T.A., Endoh, T., Fujimura, Y., Ohara, O., Toyoda, T., Otte, A.P., Okano, M.,  
518 Brockdorff, N., Vidal, M., et al. (2008). Polycomb group proteins Ring1A/B are functionally linked to  
519 the core transcriptional regulatory circuitry to maintain ES cell identity. *Development* *135*, 1513–  
520 1524.
- 521 Farcas, A.M., Blackledge, N.P., Sudbery, I., Long, H.K., McGouran, J.F., Rose, N.R., Lee, S., Sims,  
522 D., Cerase, A., Sheahan, T.W., et al. (2012). KDM2B links the Polycomb Repressive Complex 1  
523 (PRC1) to recognition of CpG islands. *Elife* *1*:e00205.
- 524 Faust, C., Lawson, K.A., Schork, N.J., Thiel, B., and Magnuson, T. (1998). The Polycomb-group gene  
525 *eed* is required for normal morphogenetic movements during gastrulation in the mouse embryo.  
526 *Development* *125*, 4495–4506.
- 527 Fursova, N.A., Blackledge, N.P., Nakayama, M., Ito, S., Koseki, Y., Farcas, A.M., King, H.W.,  
528 Koseki, H., and Klose, R.J. (2019). Synergy between Variant PRC1 Complexes Defines Polycomb-  
529 Mediated Gene Repression. *Mol. Cell*, *74*, 1020-1036.e8.
- 530 Georgiou, G., and van Heeringen, S.J. (2016). fluff: exploratory analysis and visualization of high-  
531 throughput sequencing data. *PeerJ* *4*, e2209.
- 532 Grijzenhout, A., Godwin, J., Koseki, H., Gdula, M.R., Szumska, D., McGouran, J.F., Bhattacharya,

- 533 S., Kessler, B.M., Brockdorff, N., and Cooper, S. (2016). Functional analysis of AEBP2, a PRC2  
534 Polycomb protein, reveals a Trithorax phenotype in embryonic development and in ESCs.  
535 *Development* 143, 2716–2723.
- 536 Hauri, S., Comoglio, F., Seimiya, M., Gerstung, M., Glatter, T., Hansen, K., Aebersold, R., Paro, R.,  
537 Gstaiger, M., and Beisel, C. (2016). A High-Density Map for Navigating the Human Polycomb  
538 Complexome. *Cell Rep.* 17, 583–595.
- 539 Herz, H.-M., Mohan, M., Garrett, A.S., Miller, C., Casto, D., Zhang, Y., Seidel, C., Haug, J.S.,  
540 Florens, L., Washburn, M.P., et al. (2012). Polycomb repressive complex 2-dependent and -  
541 independent functions of Jarid2 in transcriptional regulation in *Drosophila*. *Mol. Cell. Biol.* 32, 1683–  
542 1693.
- 543 Isono, K., Endo, T.A., Ku, M., Yamada, D., Suzuki, R., Sharif, J., Ishikura, T., Toyoda, T., Bernstein,  
544 B.E., and Koseki, H. (2013). SAM Domain Polymerization Links Subnuclear Clustering of PRC1 to  
545 Gene Silencing. *Dev. Cell* 26, 565–577.
- 546 Kalb, R., Latwiel, S., Baymaz, H.I., Jansen, P.W.T.C., Müller, C.W., Vermeulen, M., and Müller, J.  
547 (2014). Histone H2A monoubiquitination promotes histone H3 methylation in Polycomb repression.  
548 *Nat. Struct. Mol. Biol.* 21, 569–571.
- 549 Kaneko, S., Son, J., Bonasio, R., Shen, S.S., and Reinberg, D. (2014). Nascent RNA interaction keeps  
550 PRC2 activity poised and in check. *Genes Dev.* 28, 1983–1988.
- 551 Kloet, S.L., Makowski, M.M., Baymaz, H.I., van Voorthuijsen, L., Karemaker, I.D., Santanach, A.,  
552 Jansen, P.W.T.C., Di Croce, L., and Vermeulen, M. (2016). The dynamic interactome and genomic  
553 targets of Polycomb complexes during stem-cell differentiation. *Nat. Struct. Mol. Biol.* 23, 682–690.
- 554 Landeira, D., Sauer, S., Poot, R., Dvorkina, M., Mazzarella, L., Jørgensen, H.F., Pereira, C.F., Leleu,  
555 M., Piccolo, F.M., Spivakov, M., et al. (2010). Jarid2 is a PRC2 component in embryonic stem cells  
556 required for multi-lineage differentiation and recruitment of PRC1 and RNA Polymerase II to  
557 developmental regulators. *Nat. Cell Biol.* 12, 618–624.
- 558 Laprell, F., Finkl, K., and Müller, J. (2017). Propagation of Polycomb-repressed chromatin requires  
559 sequence-specific recruitment to DNA. *Science* (80- ). 356, 85–88.
- 560 Lau, M.S., Schwartz, M.G., Kundu, S., Savol, A.J., Wang, P.I., Marr, S.K., Grau, D.J., Schorderet, P.,  
561 Sadreyev, R.I., Tabin, C.J., et al. (2017). Mutation of a nucleosome compaction region disrupts  
562 Polycomb-mediated axial patterning. *Science* (80- ). 355, 1081–1084.
- 563 Li, G., Margueron, R., Ku, M., Chambon, P., Bernstein, B.E., and Reinberg, D. (2010). Jarid2 and  
564 PRC2, partners in regulating gene expression. *Genes Dev.* 24, 368–380.
- 565 Li, H., Liefke, R., Jiang, J., Kurland, J.V., Tian, W., Deng, P., Zhang, W., He, Q., Patel, D.J., Bulyk,  
566 M.L., et al. (2017). Polycomb-like proteins link the PRC2 complex to CpG islands. *Nature* 549, 287–  
567 291.
- 568 Li, X., Isono, K.-I., Yamada, D., Endo, T.A., Endoh, M., Shinga, J., Mizutani-Koseki, Y., Otte, A.P.,  
569 Casanova, M., Kitamura, H., et al. (2011). Mammalian polycomb-like Pcl2/Mtf2 is a novel regulatory  
570 component of PRC2 that can differentially modulate polycomb activity both at the Hox gene cluster  
571 and at *Cdkn2a* genes. *Mol. Cell. Biol.* 31, 351–364.
- 572 Liefke, R., Karwacki-Neisius, V., and Shi, Y. (2016). EPOP Interacts with Elongin BC and USP7 to  
573 Modulate the Chromatin Landscape. *Mol. Cell* 64, 659–672.

- 574 Long, H.K., Sims, D., Heger, A., Blackledge, N.P., Kutter, C., Wright, M.L., Grützner, F., Odom,  
575 D.T., Patient, R., Ponting, C.P., et al. (2013). Epigenetic conservation at gene regulatory elements  
576 revealed by non-methylated DNA profiling in seven vertebrates. *Elife* 2, e00348.
- 577 Margueron, R., Justin, N., Ohno, K., Sharpe, M.L., Son, J., Drury, W.J., Voigt, P., Martin, S.R.,  
578 Taylor, W.R., De Marco, V., et al. (2009). Role of the polycomb protein EED in the propagation of  
579 repressive histone marks. *Nature* 461, 762–767.
- 580 van Mierlo, G., Veenstra, G.J.C., Vermeulen, M., and Marks, H. (2019a). The Complexity of PRC2  
581 Subcomplexes. *Trends Cell Biol.*
- 582 van Mierlo, G., Dirks, R.A.M., De Clerck, L., Brinkman, A.B., Huth, M., Kloet, S.L., Saksouk, N.,  
583 Kroeze, L.I., Willems, S., Farlik, M., et al. (2019b). Integrative Proteomic Profiling Reveals PRC2-  
584 Dependent Epigenetic Crosstalk Maintains Ground-State Pluripotency. *Cell Stem Cell* 24, 123–  
585 137.e8.
- 586 Morey, L., Pascual, G., Cozzuto, L., Roma, G., Wutz, A., Benitah, S.A., and Di Croce, L. (2012).  
587 Nonoverlapping functions of the polycomb group Cbx family of proteins in embryonic stem cells.  
588 *Cell Stem Cell* 10, 47–62.
- 589 Morey, L., Aloia, L., Cozzuto, L., Benitah, S.A., and Di Croce, L. (2013). RYBP and Cbx7 Define  
590 Specific Biological Functions of Polycomb Complexes in Mouse Embryonic Stem Cells. *Cell Rep.* 3,  
591 60–69.
- 592 Motenko, H., Neuhauser, S.B., O’Keefe, M., and Richardson, J.E. (2015). MouseMine: a new data  
593 warehouse for MGI. *Mamm. Genome* 26, 325–330.
- 594 O’Carroll, D., Erhardt, S., Pagani, M., Barton, S.C., Surani, M.A., and Jenuwein, T. (2001). The  
595 Polycomb-Group Gene *Ezh2* Is Required for Early Mouse Development. *Mol. Cell Biol.* 21, 4330–  
596 4336.
- 597 Oksuz, O., Narendra, V., Lee, C.-H., Descostes, N., LeRoy, G., Raviram, R., Blumenberg, L., Karch,  
598 K., Rocha, P.P., Garcia, B.A., et al. (2018). Capturing the Onset of PRC2-Mediated Repressive  
599 Domain Formation. *Mol. Cell* 70, 1149–1162.e5.
- 600 Pasini, D., Bracken, A.P., Hansen, J.B., Capillo, M., and Helin, K. (2007). The polycomb group  
601 protein *Suz12* is required for embryonic stem cell differentiation. *Mol. Cell Biol.* 27, 3769–3779.
- 602 Pasini, D., Cloos, P.A.C., Walfridsson, J., Olsson, L., Bukowski, J.P., Johansen, J. V., Bak, M.,  
603 Tommerup, N., Rappsilber, J., and Helin, K. (2010). JARID2 regulates binding of the Polycomb  
604 repressive complex 2 to target genes in ES cells. *Nature* 464, 306–310.
- 605 Pengelly, A.R., Copur, Ö., Jäckle, H., Herzig, A., and Müller, J. (2013). A histone mutant reproduces  
606 the phenotype caused by loss of histone-modifying factor Polycomb. *Science* 339, 698–699.
- 607 Perino, M., van Mierlo, G., Karemaker, I.D., van Genesen, S., Vermeulen, M., Marks, H., van  
608 Heeringen, S.J., and Veenstra, G.J.C. (2018). MTF2 recruits Polycomb Repressive Complex 2 by  
609 helical-shape-selective DNA binding. *Nat. Genet.* 50, 1002–1010.
- 610 Poepsel, S., Kasinath, V., and Nogales, E. (2018). Cryo-EM structures of PRC2 simultaneously  
611 engaged with two functionally distinct nucleosomes. *Nat. Struct. Mol. Biol.* 25, 154–162.
- 612 Qi, W., Zhao, K., Gu, J., Huang, Y., Wang, Y., Zhang, H., Zhang, M., Zhang, J., Yu, Z., Li, L., et al.  
613 (2017). An allosteric PRC2 inhibitor targeting the H3K27me3 binding pocket of EED. *Nat. Chem.*  
614 *Biol.* 13, 381–388.



- 615 Ramírez, F., Ryan, D.P., Grüning, B., Bhardwaj, V., Kilpert, F., Richter, A.S., Heyne, S., Dündar, F.,  
616 and Manke, T. (2016). deepTools2: a next generation web server for deep-sequencing data analysis.  
617 *Nucleic Acids Res.* *44*, W160–W165.
- 618 Schoeftner, S., Sengupta, A.K., Kubicek, S., Mechtler, K., Spahn, L., Koseki, H., Jenuwein, T., and  
619 Wutz, A. (2006). Recruitment of PRC1 function at the initiation of X inactivation independent of  
620 PRC2 and silencing. *EMBO J.* *25*, 3110–3122.
- 621 Smits, A.H., Jansen, P.W.T.C., Poser, I., Hyman, A.A., and Vermeulen, M. (2013). Stoichiometry of  
622 chromatin-associated protein complexes revealed by label-free quantitative mass spectrometry-based  
623 proteomics. *Nucleic Acids Res.* *41*, e28.
- 624 Son, J., Shen, S.S., Margueron, R., and Reinberg, D. (2013). Nucleosome-binding activities within  
625 JARID2 and EZH1 regulate the function of PRC2 on chromatin. *Genes Dev.* *27*, 2663–2677.
- 626 Tavares, L., Dimitrova, E., Oxley, D., Webster, J., Poot, R., Demmers, J., Bezstarosti, K., Taylor, S.,  
627 Ura, H., Koide, H., et al. (2012). RYBP-PRC1 complexes mediate H2A ubiquitylation at polycomb  
628 target sites independently of PRC2 and H3K27me3. *Cell* *148*, 664–678.
- 629 Wu, X., Johansen, J.V., and Helin, K. (2013). Fbxl10/Kdm2b Recruits Polycomb Repressive  
630 Complex 1 to CpG Islands and Regulates H2A Ubiquitylation. *Mol. Cell* *49*, 1134–1146.
- 631 Zhang, Y., Liu, T., Meyer, C.A., Eeckhoute, J., Johnson, D.S., Bernstein, B.E., Nussbaum, C., Myers,  
632 R.M., Brown, M., Li, W., et al. (2008). Model-based Analysis of ChIP-Seq (MACS). *Genome Biol.* *9*,  
633 R137.
- 634

635 **Supplementary Figures and legends**

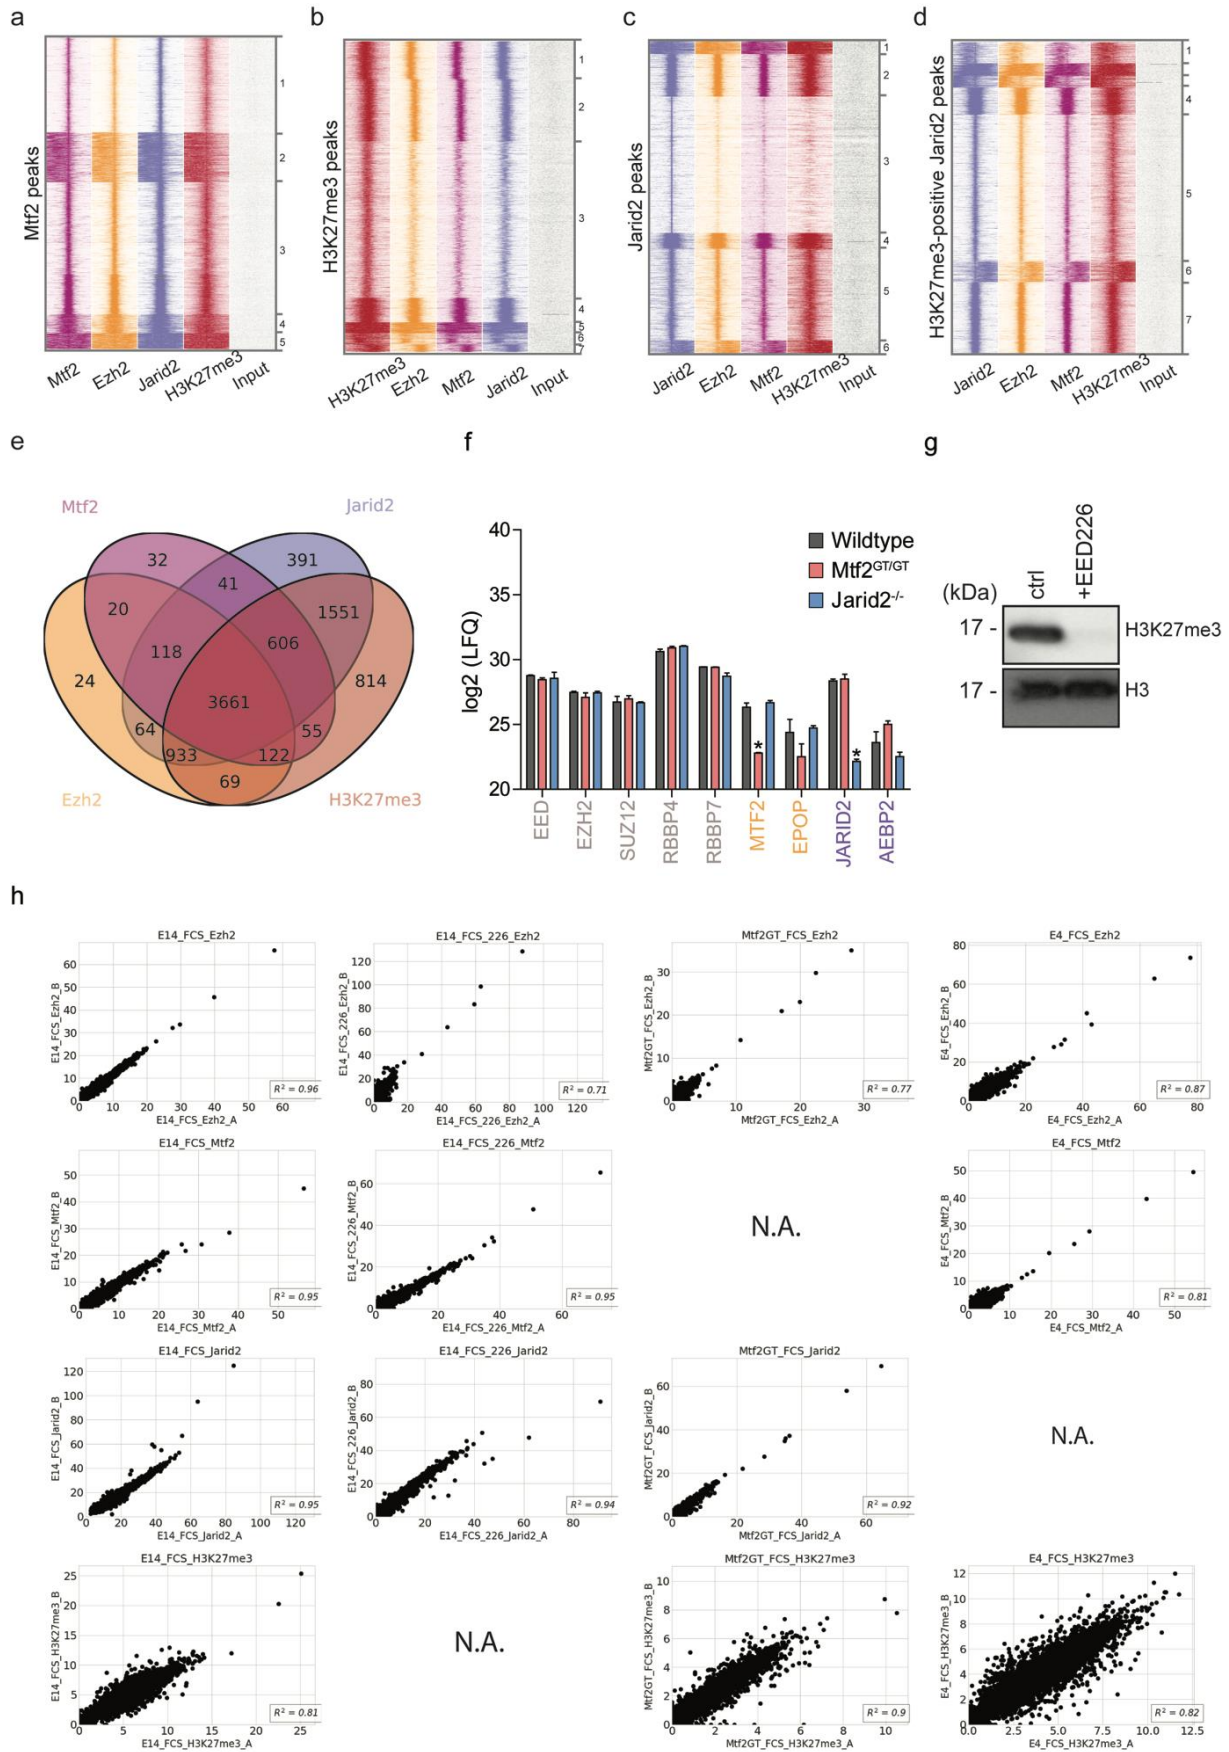

637 **Supplementary Figure 1. a-d)** Heatmap of WT ChIP-seq signal on the indicated peak set.  
638 H3K27me3-negative JARID2 peaks were excluded from further analysis. **e)** Venn diagram showing  
639 the overlap of peaks called for the ChIP-Seq of each protein independently. **f)** Mass spectrometry  
640 quantification of PRC2 subunits in the different cell lines. Detection of JARID2 and MTF2 in the  
641 respective mutants (asterisks) is due to value imputation in Perseus. **g)** Western blot validation of  
642 EED226 depletion of H3K27me3, for the ChIP shown in Figs 1 and 2. **h)** Scatterplot of peak RPKM  
643 showing high reproducibility of ChIP replicates.

644

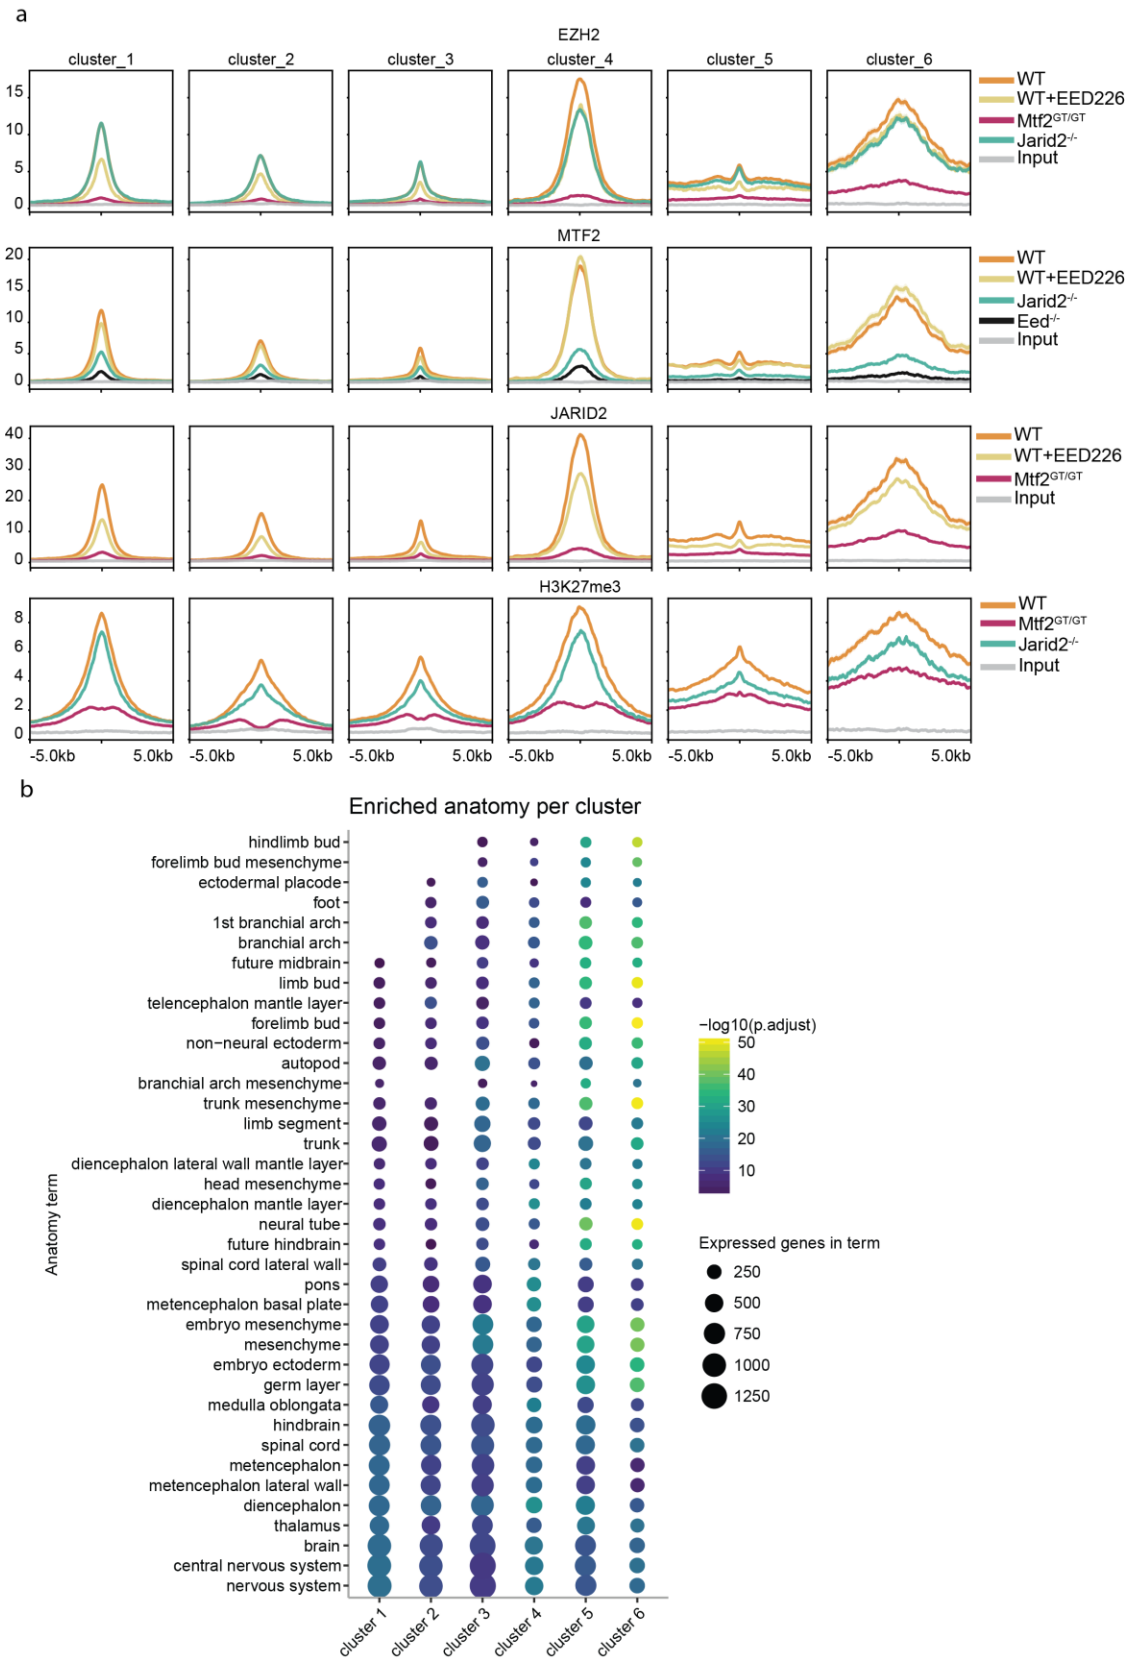

645

646 **Supplementary Figure 2. a)** Average plot of the ChIP signal shown in Fig 2a, centred on called  
647 peaks. **b)** Enrichment of anatomical terms in the genes associated with peaks in the six clusters shown  
648 in Fig 2a. Enrichment over all genes.

649



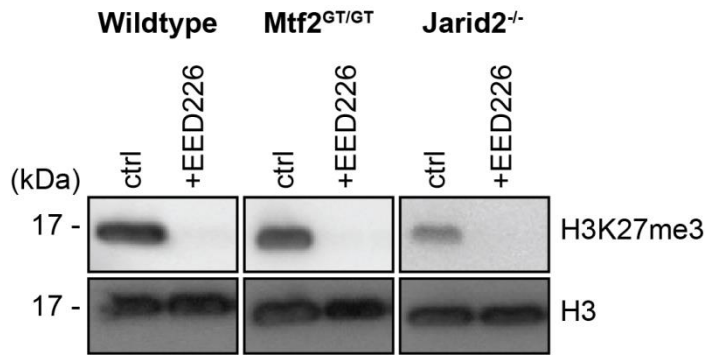

650

651 **Supplementary Figure 3.** Western blot validation of EED226 depletion of H3K27me3 for the ChIP  
 652 show in Figs 3 and 4

653

654

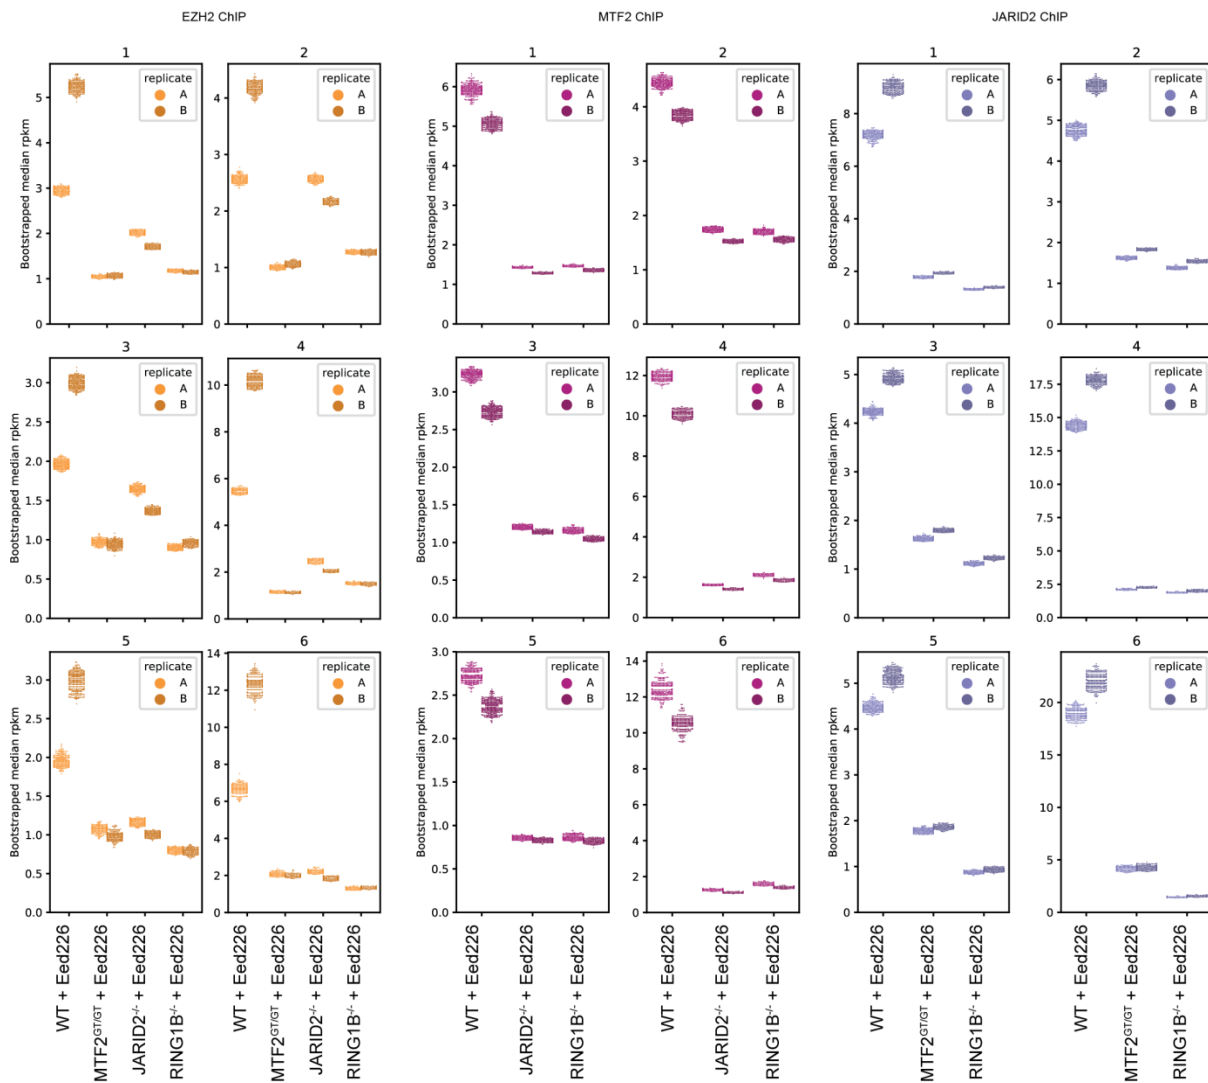

655

656 **Supplementary Figure 4.** Bootstrapping-based RPKM quantification (methods) of the signal in Fig 4  
 657 a-d. Each coloured dot represent the median of one round of bootstrapping. Replicates are plotted  
 658 independently.

659

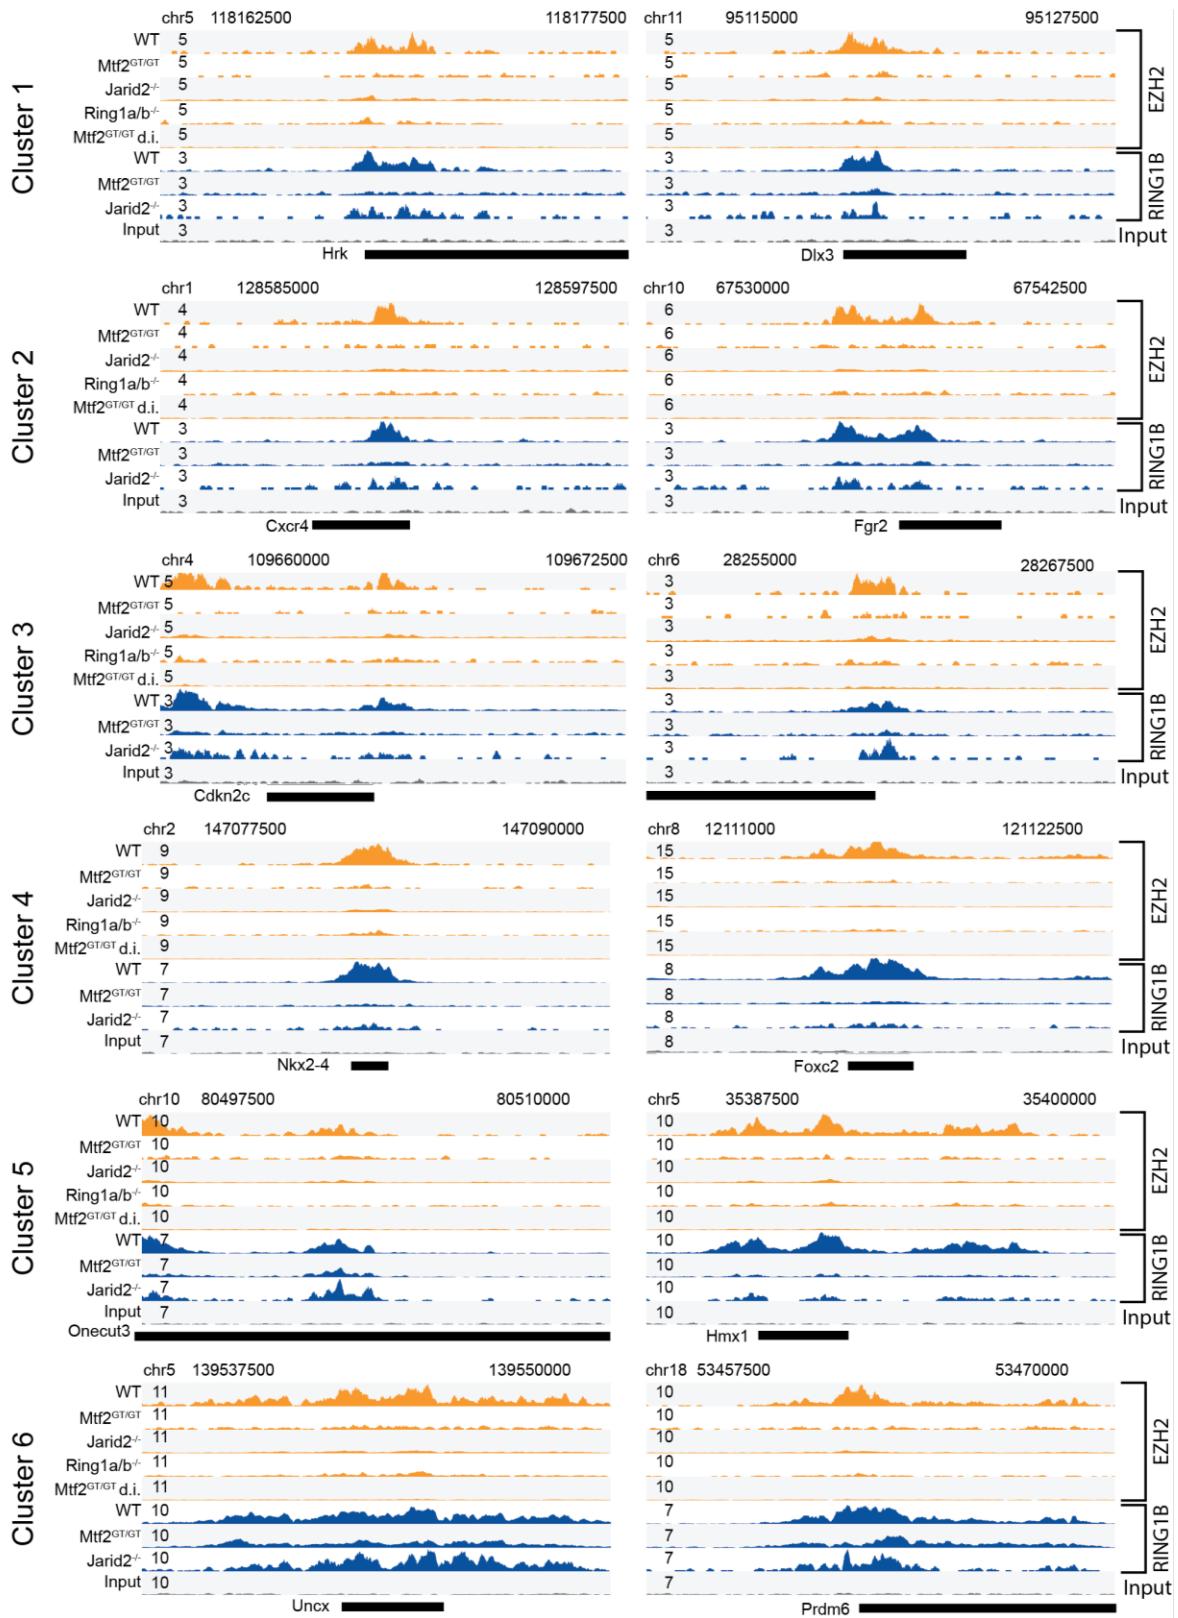

660

661 **Supplementary Figure 5.** Examples loci of the data shown in Fig 4e-f and Fig5, two for each cluster.
